# Supplementary material for: Impact of demography and population dynamics on the genetic architecture of human longevity
Source: publisher site journal article supplement (doi:10.18632/aging.101515), 2018-08-08
Supplement: Supplementary file [file aging-v10i8-101515-supplementary-material-SD2.pdf]

## SUPPLEMENTARY FIGURE

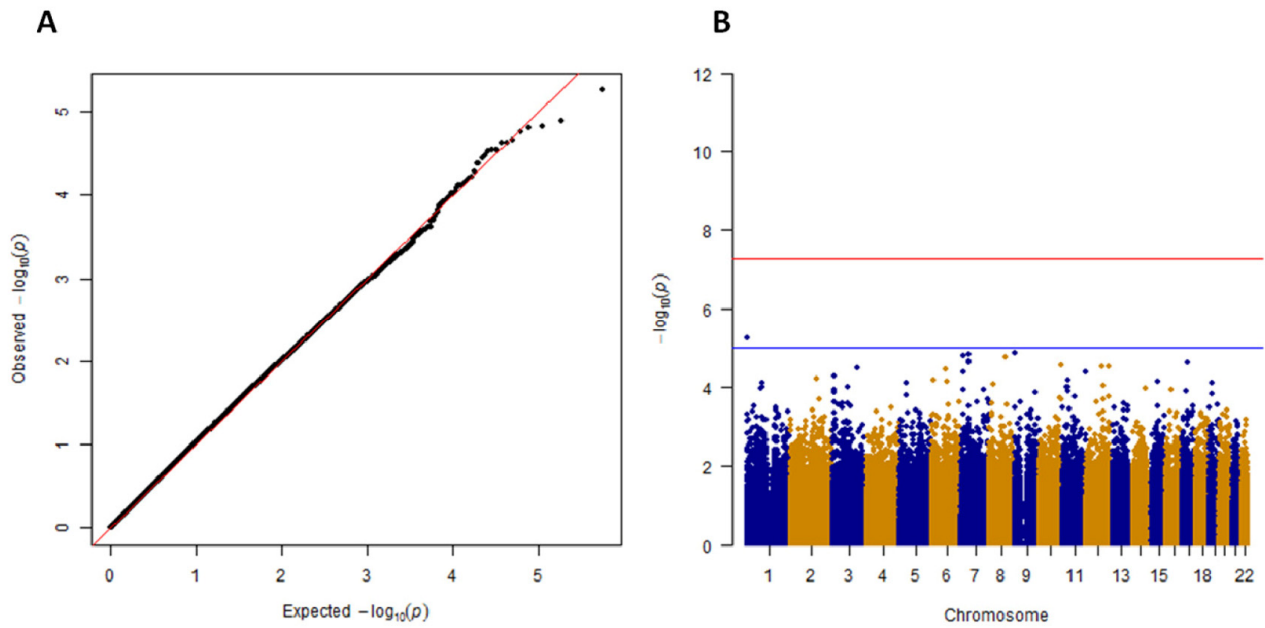

**Figure 15. Association analysis results.** (A) Manhattan plot of all SNPs tested for the association analysis by considering centenarians and controls. The x-axis shows SNPs according to their chromosomal positions. (B) QQplot of expected  $-\log_{10}(p)$ -values versus observed  $-\log_{10}(p)$ -values. Each variant is reported with a black dot. The genomic inflation factor for this plot is 1.02.
