# Supplementary material for: Impact of demography and population dynamics on the genetic architecture of human longevity
Source: Aging (Albany NY). 2018 Aug 8;10(8):1947–63. doi: 10.18632/aging.101515 (PMC6128422; doi:10.18632/aging.101515)
Supplement: Supplementary Tables [file aging-10-101515-s003.xlsx]

## Sheet: Table1S
Table 1S. Genomic intervals scoring in top 0.1% of windows with the highest fractions of Fst and |iHS|outlier SNPs. Bold iHS values indicate in which population group the candidate window reached the adopted significance threshold.
SNP	CHR	POS	Ancestral	Derived	Gene	SNP_type	SIGNIFICANT_CENT (y=yes; n=no)	iHS_sign	iHS_N_ITA	iHS_C_ITA	iHS_S_ITA	iHS_SARD	F_derived_N_ITA	F_derived_C_ITA	F_derived_S_ITA	F_derived_SARD	F_derived_FIN	F_derived_GBR	F_derived_CEU	F_derived_TSI	F_derived_IBS
rs7539625	1	67672765	G	A	IL23R	Silent	n	c_s	-2.27766	-2.67436	-2.7279	-1.84218	0.3206	0.3238	0.4551	0.266	0.2677	0.2747	0.303	0.3318	0.3178
exm-rs11805303	1	67675516	G	A	IL23R	Silent	n	c_s	-2.27766	-2.65355	-2.7279	-1.84218	0.3206	0.3263	0.4551	0.266	0.2677	0.2747	0.298	0.3364	0.3178
rs10889676	1	67722567	C	A	IL23R	Silent	n	s	-1.98898	-2.46657	-2.71017	-1.11012	0.3321	0.3238	0.4263	0.2979	0.2778	0.2582	0.2879	0.3131	0.3458
exm-rs10889677	1	67725120	C	A	IL23R	Silent	n	s	-1.98898	-2.46657	-2.71017	-1.11012	0.3321	0.3238	0.4263	0.2979	0.2778	0.2582	0.2879	0.3131	0.3458
exm144924	1	207782931	G	A	CR1	Missense_I1615V	n	sard	1.06393	1.39131	1.51675	3.12843	0.7595	0.7432	0.7147	0.2872	0.7222	0.7747	0.8232	0.7757	0.7757
exm-rs12034383	1	207803595	G	A	CR1	Silent	n	sard	-0.111852	0.319696	0.340203	3.30813	0.6145	0.5447	0.5224	0.2447	0.5505	0.6374	0.5505	0.5841	0.6682
rs17408841	2	63397974	A	G	WDPCP	Silent	n	n	-2.68916	-2.58337	-2.01256	-1.9903	0.3115	0.209	0.2404	0.3804	0.1667	0.2637	0.1717	0.2243	0.2991
rs7585664	2	63548716	A	G	WDPCP	Silent	n	n	-2.64826	-2.32728	-1.80122	-1.9585	0.3206	0.2283	0.2724	0.3936	0.2677	0.3187	0.2121	0.243	0.3505
rs2028887	2	63716223	A	G	WDPCP	Silent	n	n	2.96181	2.54031	2.10638	2.416	0.6527	0.7469	0.7115	0.6383	0.7475	0.6758	0.7727	0.7009	0.6075
rs3821083	2	172412907	C	A	CYBRD1	Silent	n	n	2.94227	2.60209	3.08518	3.00685	0.7634	0.8221	0.8636	0.7553	0.8232	0.6593	0.7172	0.7897	0.785
rs2111720	2	172422877	G	A		Intergenic	y	n_c_s	2.78627	3.35267	3.10316	2.39513	0.8053	0.6998	0.7083	0.7447	0.7778	0.8242	0.8131	0.729	0.7383
rs13029742	2	220035118	C	A	CNPPD1	Downstream gene variant	n	n	2.67718	2.19274	2.52938	1.12369	0.2977	0.3238	0.2885	0.5	0.2071	0.3297	0.3434	0.271	0.3364
exm267360	2	220037666	G	A	CNPPD1	Missense_L292P	y	n_c_s	3.4782	3.50308	3.31202	2.14449	0.3626	0.3921	0.3526	0.5851	0.2778	0.4341	0.4192	0.3458	0.4439
exm267366	2	220037756	G	A	CNPPD1	Missense_I262T	n	n_c_s	3.4782	3.40485	3.23294	1.96493	0.3626	0.3871	0.3494	0.5745	0.2677	0.4121	0.4192	0.3458	0.4439
exm394656	4	38776107	A	C	TLR10	Missense_I369L	n	n_c_s	3.01926	3.46014	2.78518	2.14024	0.4542	0.454	0.571	0.5851	0.3687	0.3242	0.3485	0.4439	0.486
exm394678	4	38776491	A	C	TLR10	Missense_N241H	n	n_c_s	3.03153	3.46999	2.81885	2.14535	0.4542	0.4541	0.5705	0.5851	0.3687	0.3242	0.3485	0.4439	0.486
rs17006113	4	120714886	A	G	RP11-236P13.1	On lincRNA	n	n	-2.91887	-1.9792	-2.19186	-2.43887	0.2901	0.2432	0.3429	0.2553	0.2626	0.2308	0.303	0.285	0.2243
rs10004197	4	120736449	G	A	RP11-236P13.1	On lincRNA	n	n	-2.66258	-1.77469	-1.84166	-1.77468	0.3154	0.2674	0.3774	0.3298	0.303	0.2637	0.3333	0.3364	0.2804
rs17006982	4	120788956	G	A	RP11-236P13.1	On lincRNA	n	n	-3.1514	-2.13361	-2.2732	-2.32218	0.2672	0.2134	0.3237	0.3085	0.2172	0.1813	0.2424	0.2477	0.2056
exm531593	6	31610686	G	A	BAG6	Missense_S619P	n	n_c_s	2.77326	3.07774	3.09892	1.57767	0.4084	0.3672	0.3814	0.5532	0.596	0.5055	0.4798	0.4486	0.3925
exm-rs15574	6	31686497	G	A	LY6G6C	Silent	n	s	2.61912	2.46155	2.66923	1.7731	0.195	0.246	0.2308	0.5213	0.3939	0.2253	0.1768	0.2804	0.1822
exm-rs805294	6	31688217	A	G	LY6G6C	Silent	n	n_c_s	3.71263	3.60314	4.02103	2.86873	0.3321	0.3375	0.3173	0.5851	0.4747	0.3407	0.2879	0.3972	0.3037
exm2264186	6	152251080	A	C	ESR1	Silent	n	n_c_s	3.01023	3.67685	3.6513	2.87262	0.3702	0.2612	0.2468	0.3085	0.3182	0.2747	0.2576	0.3084	0.2664
rs4583998	6	152260668	G	A	ESR1	Silent	n	n_c_s	2.90685	3.53182	3.52205	3.00422	0.3702	0.2618	0.2468	0.2979	0.3182	0.2747	0.2576	0.3084	0.2664
rs4543441	7	17983297	A	G		Intergenic	n	n	2.66165	2.34499	2.36723	2.11082	0.5038	0.6079	0.5737	0.5532	0.3636	0.456	0.4798	0.6121	0.6028
rs11766489	7	18003670	G	A	RNMTL1P2	On promoter_flanking_region	n	n	2.89751	2.38447	2.29137	2.15003	0.4962	0.6017	0.5641	0.5426	0.2727	0.4286	0.4697	0.6121	0.5888
rs6947751	7	18025423	A	G		On CTCF_binding_site	n	n	2.81343	2.4946	2.32557	1.88288	0.4618	0.5709	0.5833	0.4787	0.3384	0.4451	0.4545	0.5794	0.5514
rs11771320	7	36804598	G	A		Intergenic	n	c	-2.73539	-2.82555	-2.70267	-2.41088	0.3969	0.3865	0.3871	0.587	0.3737	0.4066	0.3939	0.3411	0.4299
rs4723581	7	36870228	A	G		Intergenic	n	sard	2.08044	1.84426	1.99961	2.68617	0.3321	0.4144	0.4583	0.4362	0.2222	0.3132	0.3384	0.4065	0.3598
rs2041801	7	36926841	G	A	ELMO1	Silent	n	s_sard	-2.40969	-2.65271	-3.22332	-2.81734	0.5954	0.5037	0.4551	0.5851	0.596	0.5769	0.5859	0.528	0.5421
rs4720228	7	36951929	A	C	ELMO1	Silent	n	s	-2.4932	-2.41965	-2.8695	-2.22601	0.6145	0.5447	0.4744	0.6489	0.6263	0.5934	0.6313	0.5701	0.5981
rs6601327	8	9395532	G	A		Intergenic	n	s	-2.26557	-2.45689	-2.90705	-2.11165	0.5763	0.6328	0.7019	0.5638	0.5859	0.6813	0.6313	0.6963	0.6495
rs12679892	8	9445429	A	G	TNKS	Silent	n	c_s	2.24959	2.90924	2.90146	2.48584	0.3282	0.299	0.2179	0.4255	0.3333	0.2857	0.2778	0.271	0.2523
rs13279794	8	9684014	C	A		Intergenic	n	n_c_s	-3.27531	-3.22299	-3.4378	-2.53505	0.5458	0.6216	0.6827	0.5426	0.5051	0.6099	0.6313	0.6402	0.6449
rs7015101	8	9718278	A	C		Intergenic	n	n	2.64148	2.39886	3.14638	1.83318	0.2519	0.2032	0.1763	0.3404	0.1869	0.1923	0.1717	0.1963	0.1916
rs4841254	8	9791143	G	A		On TNKS enhancer	n	n_c_s	-3.15164	-2.83886	-3.51263	-1.29716	0.5916	0.6836	0.7179	0.6383	0.5909	0.7253	0.7121	0.715	0.6869
exm2271051	9	12367988	A	G		Intergenic between LOC100049717 & TYRP1	n	sard	1.81451	2.0187	2.28087	2.8971	0.6183	0.5409	0.4936	0.2979	0.5556	0.6209	0.6717	0.5888	0.5093
rs1999380	9	12442019	C	A		Intergenic between LOC100049717 & TYRP1	n	sard	1.32456	1.75868	2.08991	3.29965	0.4615	0.454	0.4071	0.266	0.3687	0.478	0.4343	0.4252	0.3925
rs4008031	9	12460256	G	A		Intergenic between LOC100049717 & TYRP1	n	sard	2.62197	2.60259	3.04113	3.47262	0.6908	0.6266	0.5865	0.3936	0.6263	0.6813	0.7222	0.6402	0.6121
rs3739704	9	114356367	G	A	PTGR1	Silent	y	s	-2.11453	-2.32184	-2.70926	-1.96483	0.458	0.4119	0.5513	0.4362	0.3889	0.4066	0.3788	0.514	0.4533
exm772339	9	114359624	C	A	PTGR1	Missense_A27S	y	n_c_s	2.91925	3.24583	3.67093	2.83359	0.5344	0.5881	0.4455	0.5638	0.6111	0.5934	0.6212	0.486	0.5467
rs574700	11	59855483	A	G	MS4A2	Upstream gene variant	n	sard	1.31269	0.333961	-0.0293249	3.75851	0.98855	0.97395	0.96154	0.8723	0.9899	0.9725	0.9394	0.9346	0.972
rs1441585	11	59855711	G	A	MS4A2	Upstream gene variant	n	sard	1.31269	0.125465	-0.209491	3.75851	0.98855	0.97146	0.95833	0.8723	0.9899	0.978	0.9394	0.9346	0.972
exm-rs3116602	13	51111355	A	C	DLEU1	On lincRNA	y	c_s	-3.12854	-3.02249	-3.25571	-2.40578	0.187	0.2233	0.2147	0.3723	0.2475	0.2198	0.1869	0.1963	0.2056
exm-rs3118914	13	51116901	C	A	DLEU1	On lincRNA	y	c_s	-3.12854	-3.02249	-3.25571	-2.40578	0.187	0.2233	0.2147	0.3723	0.2475	0.2198	0.1869	0.1963	0.2103
rs3116615	13	51158752	A	G	DLEU1	On lincRNA	n	c_s	-3.33182	-3.39553	-3.71479	-2.55659	0.1908	0.2295	0.2179	0.383	0.2424	0.2143	0.1818	0.2009	0.2103

## Sheet: Table 2S
Table 2S. List of SNPs showing a p-value < 10-4 in the comparison between centenarians and controls. The genes identified also in the HRS cohort were indicated with "y" symbol in males (M) and females (F).
CHR	SNP	BP	GENE_NAME	A1	OR	L95	U95	P	F_	F_	HRS	HRS (F)
									CENT	CTRL	(M)
1	rs10799228	4405998		A	4.044	2.213	7.388	5.55e-06	0.07658	0.04669
1	rs1336573	88668577		A	1.601	1.264	2.029	9.68e-05	0.455	0.3797
1	rs6428642	88710048		A	1.619	1.276	2.056	7.48e-05	0.4099	0.3325
2	rs1438873	148287033		A	1.601	1.272	2.015	6.13e-05	0.461	0.3912
3	rs4684672	10272775	IRAK2	A	1.604	1.276	2.017	5.28e-05	0.503	0.4153	y	\
3	rs9847448	84930139		A	0.5606	0.4192	0.7498	9.56e-05	0.1802	0.2574
3	rs4683806	139844670	CLSTN2	A	0.6152	0.4891	0.7737	3.3e-05	0.4174	0.4754	y	y
5	rs10063005	34576037		G	1.659	1.291	2.132	7.61e-05	0.3483	0.2568
6	rs2494774	13490904		G	1.615	1.277	2.043	6.41e-05	0.5256	0.4471
6	rs13215600	85417046		A	1.895	1.4	2.565	3.56e-05	0.2072	0.1527
6	rs860844	85462640	TBX18	G	1.858	1.369	2.521	6.93e-05	0.1982	0.147	y	y
7	rs979058	10836487		G	0.6082	0.4795	0.7714	4.13e-05	0.4384	0.5078
7	rs726395	15734715	MEOX2-AS	A	1.656	1.317	2.081	1.54e-05	0.5105	0.4256	y	\
7	rs61740895	45122723	NACAD	A	1.648	1.309	2.076	2.19e-05	0.4114	0.329	\	y
7	rs3735494	45124286	NACAD	G	1.648	1.307	2.077	2.38e-05	0.4114	0.3323	\	y
7	rs3735495	45124465	NACAD	A	1.669	1.323	2.104	1.52e-05	0.4129	0.3312	\	y
8	rs12549377	21373577		A	1.779	1.336	2.37	8.23e-05	0.2523	0.2025
8	rs3104988	96576196	LOC100616530	A	0.5677	0.4384	0.7351	1.75e-05	0.3818	0.4681
9	rs7866316	2123435	SMARCA2	A	2.078	1.495	2.887	1.32e-05	0.1877	0.1339	y	y
10	rs7916337	131605924		G	1.664	1.311	2.113	2.84e-05	0.3589	0.271
11	rs17243259	26353951	ANO3	A	0.5913	0.4541	0.7701	9.65e-05	0.2553	0.3251	y	y
11	rs427996	30658439		A	1.631	1.283	2.073	6.57e-05	0.4474	0.37
11	rs10894114	129564333		A	0.5675	0.4328	0.744	4.13e-05	0.2162	0.2898
12	rs7980716	92916629		G	1.647	1.303	2.081	2.9e-05	0.4835	0.3855
12	rs10860525	100192515	ANKS1B	A	1.591	1.261	2.008	9.25e-05	0.5325	0.487	y	y
12	rs7300513	128063305		A	0.5369	0.4009	0.719	3e-05	0.1787	0.2403
15	rs11856192	54289389		A	1.706	1.31	2.222	7.37e-05	0.3168	0.2503
17	rs16578	31346135	ASIC2	A	1.892	1.408	2.544	2.39e-05	0.2252	0.1565	y	y
19	rs12985909	18439383		A	1.593	1.265	2.007	7.54e-05	0.5195	0.4541

## Sheet: Table 3S
Table 3S.eQTL calculated for rs1053959 (PTGR1 gene) calculated with GTEx
Gencode Id	Gene Symbol	SNP Id	P-Value	Effect Size	Tissue
ENSG00000106853.12	PTGR1	rs1053959	1.7e-10	-0.41	Artery - Tibial
ENSG00000106853.12	PTGR1	rs1053959	2.6e-09	-0.32	Nerve - Tibial
ENSG00000106853.12	PTGR1	rs1053959	1.9e-08	-0.32	Adipose - Subcutaneous
ENSG00000106853.12	PTGR1	rs1053959	4.3e-08	-0.39	Esophagus - Muscularis
ENSG00000106853.12	PTGR1	rs1053959	1.3e-07	-0.32	Muscle - Skeletal
ENSG00000106853.12	PTGR1	rs1053959	2.6e-07	-0.33	Lung
ENSG00000106853.12	PTGR1	rs1053959	1.3e-06	-0.28	Thyroid
ENSG00000106853.12	PTGR1	rs1053959	7.5e-06	-0.22	Cells - Transformed fibroblasts
ENSG00000106853.12	PTGR1	rs1053959	1.5e-05	-0.27	Skin - Sun Exposed (Lower leg)
ENSG00000106853.12	PTGR1	rs1053959	1.6e-05	-0.46	Brain - Putamen (basal ganglia)
ENSG00000106853.12	PTGR1	rs1053959	3e-05	-0.31	Breast - Mammary Tissue
ENSG00000106853.12	PTGR1	rs1053959	3.4e-05	-0.34	Artery - Aorta

## Sheet: Table 4S
Table 4S. KEGG pathway analyses calculated by means of i-GSEA4GWAS.
	Gene Set Name	P-value	FDR value
KEGG	INOSITOL PHOSPHATE METABOLISM	0.001	0.011333
KEGG	HOMOLOGOUS RECOMBINATION	0.002	0.029714
KEGG	LINOLEIC ACID METABOLISM	0.003	0.036833
KEGG	DRUG METABOLISM CYTOCHROME P450	0.001	0.0396
KEGG	DNA REPLICATION	0.004	0.057053
KEGG	RETINOL METABOLISM	0.001	0.0588
KEGG	ETHER LIPID METABOLISM	0.004	0.100609
KEGG	MISMATCH REPAIR	0.008	0.149647
KEGG	PORPHYRIN AND CHLOROPHYLL METABOLISM	0.01	0.151286
KEGG	ARACHIDONIC ACID METABOLISM	0.008	0.151769
KEGG	APOPTOSIS	0.01	0.152368
KEGG	UBIQUITIN MEDIATED PROTEOLYSIS	0.009	0.197512
KEGG	STARCH AND SUCROSE METABOLISM	0.008	0.222591
KEGG	GLYCOSAMINOGLYCAN BIOSYNTHESIS HEPARAN SULFATE	0.009	0.238354
KEGG	METABOLISM OF XENOBIOTICS BY CYTOCHROME P450	0.011	0.241043
KEGG	PHOSPHATIDYLINOSITOL SIGNALING SYSTEM	0.008	0.241935
KEGG	LEUKOCYTE TRANSENDOTHELIAL MIGRATION	0.008	0.26798
KEGG	HEDGEHOG SIGNALING PATHWAY	0.022	0.313967
KEGG	JAK STAT SIGNALING PATHWAY	0.022	0.317107
KEGG	ENDOCYTOSIS	0.024	0.33193
KEGG	ERBB SIGNALING PATHWAY	0.026	0.334258
KEGG	O GLYCAN BIOSYNTHESIS	0.018	0.336292
KEGG	DRUG METABOLISM OTHER ENZYMES	0.035	0.340753
KEGG	GLYCEROPHOSPHOLIPID METABOLISM	0.033	0.358741
KEGG	TIGHT JUNCTION	0.025	0.360305
KEGG	SELENOAMINO ACID METABOLISM	0.043	0.361875
KEGG	HISTIDINE METABOLISM	0.057	0.398989
KEGG	BASE EXCISION REPAIR	0.054	0.433792
KEGG	MTOR SIGNALING PATHWAY	0.055	0.43751
KEGG	PURINE METABOLISM	0.046	0.44103
KEGG	RIG I LIKE RECEPTOR SIGNALING PATHWAY	0.063	0.471624
KEGG	TYROSINE METABOLISM	0.073	0.478202
KEGG	PENTOSE AND GLUCURONATE INTERCONVERSIONS	0.071	0.4975
KEGG	ASCORBATE AND ALDARATE METABOLISM	0.073	0.498861
KEGG	CELL ADHESION MOLECULES CAMS	0.078	0.4995
KEGG	HYPERTROPHIC CARDIOMYOPATHY HCM	0.07	0.499917
KEGG	PROTEASOME	0.083	0.502614
KEGG	REGULATION OF ACTIN CYTOSKELETON	0.065	0.502736
KEGG	TOLL LIKE RECEPTOR SIGNALING PATHWAY	0.072	0.510841
KEGG	NATURAL KILLER CELL MEDIATED CYTOTOXICITY	0.096	0.54475
KEGG	ALANINE ASPARTATE AND GLUTAMATE METABOLISM	0.109	0.554099
KEGG	CHEMOKINE SIGNALING PATHWAY	0.096	0.561482
KEGG	SPLICEOSOME	0.114	0.578
KEGG	GLUTATHIONE METABOLISM	0.138	0.599785
KEGG	DILATED CARDIOMYOPATHY	0.122	0.599973
KEGG	VASCULAR SMOOTH MUSCLE CONTRACTION	0.15	0.641543
KEGG	ADHERENS JUNCTION	0.16	0.657049
KEGG	NUCLEOTIDE EXCISION REPAIR	0.166	0.668493
KEGG	TRYPTOPHAN METABOLISM	0.182	0.679833
KEGG	AXON GUIDANCE	0.177	0.685122
KEGG	VEGF SIGNALING PATHWAY	0.198	0.705481
KEGG	OXIDATIVE PHOSPHORYLATION	0.207	0.714313
KEGG	CYTOSOLIC DNA SENSING PATHWAY	0.191	0.717822
KEGG	CYSTEINE AND METHIONINE METABOLISM	0.216	0.738955
KEGG	CARDIAC MUSCLE CONTRACTION	0.245	0.739324
KEGG	RNA DEGRADATION	0.224	0.741262
KEGG	TASTE TRANSDUCTION	0.259	0.770433
KEGG	PYRIMIDINE METABOLISM	0.252	0.773238
KEGG	B CELL RECEPTOR SIGNALING PATHWAY	0.271	0.78338
KEGG	NICOTINATE AND NICOTINAMIDE METABOLISM	0.302	0.788907
KEGG	ABC TRANSPORTERS	0.289	0.789567
KEGG	NOD LIKE RECEPTOR SIGNALING PATHWAY	0.278	0.792584
KEGG	GNRH SIGNALING PATHWAY	0.295	0.79483
KEGG	GLYCEROLIPID METABOLISM	0.325	0.795942
KEGG	ECM RECEPTOR INTERACTION	0.374	0.821243
KEGG	GLYCOSYLPHOSPHATIDYLINOSITOL GPI ANCHOR BIOSYNTHESIS	0.349	0.822407
KEGG	REGULATION OF AUTOPHAGY	0.327	0.823065
KEGG	LYSINE DEGRADATION	0.371	0.823808
KEGG	BETA ALANINE METABOLISM	0.37	0.827286
KEGG	STEROID HORMONE BIOSYNTHESIS	0.431	0.830617
KEGG	COMPLEMENT AND COAGULATION CASCADES	0.411	0.833479
KEGG	ADIPOCYTOKINE SIGNALING PATHWAY	0.414	0.834318
KEGG	ARGININE AND PROLINE METABOLISM	0.385	0.838905
KEGG	GALACTOSE METABOLISM	0.386	0.839133
KEGG	T CELL RECEPTOR SIGNALING PATHWAY	0.414	0.839597
KEGG	GLYCINE SERINE AND THREONINE METABOLISM	0.422	0.843216
KEGG	FC GAMMA R MEDIATED PHAGOCYTOSIS	0.467	0.843398
KEGG	PEROXISOME	0.399	0.846945
KEGG	CALCIUM SIGNALING PATHWAY	0.504	0.862667
KEGG	CITRATE CYCLE TCA CYCLE	0.481	0.863311
KEGG	HEMATOPOIETIC CELL LINEAGE	0.498	0.864283
KEGG	CELL CYCLE	0.485	0.866616
KEGG	FOCAL ADHESION	0.56	0.866774
KEGG	PROGESTERONE MEDIATED OOCYTE MATURATION	0.531	0.8675
KEGG	TGF BETA SIGNALING PATHWAY	0.52	0.872831
KEGG	WNT SIGNALING PATHWAY	0.573	0.873561
KEGG	AMINO SUGAR AND NUCLEOTIDE SUGAR METABOLISM	0.499	0.875661
KEGG	NEUROTROPHIN SIGNALING PATHWAY	0.578	0.87567
KEGG	LONG TERM DEPRESSION	0.582	0.881292
KEGG	ARRHYTHMOGENIC RIGHT VENTRICULAR CARDIOMYOPATHY ARVC	0.617	0.898011
KEGG	P53 SIGNALING PATHWAY	0.593	0.900424
KEGG	INSULIN SIGNALING PATHWAY	0.608	0.905808
KEGG	LYSOSOME	0.628	0.91029
KEGG	GLYCOLYSIS GLUCONEOGENESIS	0.646	0.920365
KEGG	FATTY ACID METABOLISM	0.674	0.936631
KEGG	FRUCTOSE AND MANNOSE METABOLISM	0.688	0.938184
KEGG	ALDOSTERONE REGULATED SODIUM REABSORPTION	0.69	0.94087
KEGG	NOTCH SIGNALING PATHWAY	0.721	0.948601
KEGG	AMINOACYL TRNA BIOSYNTHESIS	0.735	0.95085
KEGG	FC EPSILON RI SIGNALING PATHWAY	0.741	0.951772
KEGG	OOCYTE MEIOSIS	0.735	0.956443
KEGG	BASAL TRANSCRIPTION FACTORS	0.743	0.960249
KEGG	VALINE LEUCINE AND ISOLEUCINE DEGRADATION	0.775	0.961743
KEGG	RIBOSOME	0.775	0.962317
KEGG	RNA POLYMERASE	0.774	0.963101
KEGG	LONG TERM POTENTIATION	0.782	0.968212
KEGG	PROPANOATE METABOLISM	0.854	0.98348
KEGG	INTESTINAL IMMUNE NETWORK FOR IGA PRODUCTION	0.917	0.988884
KEGG	BUTANOATE METABOLISM	0.917	0.991056
KEGG	PROTEIN EXPORT	0.897	0.993934
KEGG	VASOPRESSIN REGULATED WATER REABSORPTION	0.87	0.994187
KEGG	PPAR SIGNALING PATHWAY	0.882	0.994438
KEGG	GAP JUNCTION	0.943	0.99591
KEGG	DORSO VENTRAL AXIS FORMATION	0.887	0.996343
KEGG	N GLYCAN BIOSYNTHESIS	0.945	0.99727
KEGG	SPHINGOLIPID METABOLISM	0.973	0.997319
KEGG	ANTIGEN PROCESSING AND PRESENTATION	0.983	0.99848
KEGG	PENTOSE PHOSPHATE PATHWAY	0.985	0.998545
KEGG	SNARE INTERACTIONS IN VESICULAR TRANSPORT	1	0.99995
KEGG	GLYCOSPHINGOLIPID BIOSYNTHESIS LACTO AND NEOLACTO SERIES	0.997	1
KEGG	MELANOGENESIS	0.988	1
KEGG	PYRUVATE METABOLISM	1	1

## Sheet: Table5S
Table 5S. Significant genes in the pathways identified by using i-GSEA4GWAS.
Gene Set Name
KEGG: INOSITOL PHOSPHATE METABOLISM
Significant genes in the pathway/gene set
Associated Gene Name	Reference Id	Variant Start	Variant End	Association Value	Ensembl Annotation	Related eQTL Genes
PLCE1	rs3736901	96044734	96044734	3.24192
PLCB1	rs6055594	8158503	8158503	3.09077
PLCB3	rs12146487	64026639	64026639	2.86012	missense_variant;PolyPhen:possibly damaging;SIFT:tolerated
PIK3C2G	rs10841036	18693226	18693226	2.37284		PITPNC1
PLCG2	rs4325546	81873821	81873821	2.17796
PIP5K1B	rs10869163	71245156	71245156	2.15814
INPP5A	rs10781585	134553369	134553369	2.10841
INPP4B	rs1425533	143421175	143421175	1.94006
ITPKB	rs3820636	226841347	226841347	1.83803
SYNJ2	rs12203105	158495863	158495863	1.82536
MINPP1	rs17108807	89366175	89366175	1.82131
ITPK1	rs2749509	93528114	93528114	1.8066
PIK3CA	rs1976765	178833722	178833722	1.68909		KCNMB3
PLCB4	rs6056523	9292176	9292176	1.53477
IPMK	rs10826158	59887998	59887998	1.52317
PLCD3	rs72832860	43190322	43190322	1.50906
PIK3C3	rs12185285	39488062	39488062	1.49458
PLCZ1	rs1487070	18848131	18848131	1.49417
IMPA1	rs2195099	82523326	82523326	1.49093		IMPA1
IPPK	rs724102	95383290	95383290	1.45992
PLCG1	rs2228246	39792063	39792063	1.45544	missense_variant;PolyPhen:benign;SIFT:tolerated
IMPA2	rs949233	12053552	12053552	1.44466
PTEN	rs2673813	89801899	89801899	1.42899
PIKFYVE	rs999890	209190632	209190632	1.37779	missense_variant;PolyPhen:benign;SIFT:tolerated
Gene Set Name
KEGG: HOMOLOGOUS RECOMBINATION
Significant genes in the pathway/gene set
Associated Gene Name	Reference Id	Variant Start	Variant End	Association Value	Ensembl Annotation	Related eQTL Genes
XRCC2	rs3218504	152351316	152351316	3.20391
SHFM1	rs4729274	96313582	96313582	2.23173
RAD51B	rs1956533	68911554	68911554	2.09286
MRE11A	rs12788248	94200389	94200389	1.90309
POLD3	rs11236209	74390944	74390944	1.84771
RPA1	rs16951710	1758203	1758203	1.84436
TOP3A	rs12946752	18176423	18176423	1.82189		SHMT1
POLD1	rs1726801	50905074	50905074	1.81673	missense_variant;PolyPhen:benign;SIFT:tolerated
RPA3	rs12668835	7691176	7691176	1.64685
MUS81	rs34891773	65631361	65631361	1.55037	missense_variant,incomplete_terminal_codon_variant;PolyPhen:probably damaging,possibly damaging;SIFT:deleterious
EME1	rs16948981	48457251	48457251	1.34872
BRCA2	rs2320236	32910328	32910328	1.3292		BRCA2
Gene Set Name
KEGG: LINOLEIC ACID METABOLISM
Significant genes in the pathway/gene set
Associated Gene Name	Reference Id	Variant Start	Variant End	Association Value	Ensembl Annotation	Related eQTL Genes
CYP2J2	rs12743907	60402488	60402488	3.00052
CYP2C9	rs9332220	96743943	96743943	2.56463
CYP2C19	rs10786172	96581094	96581094	2.49255
CYP2C18	rs2860840	96495232	96495232	2.44672
PLA2G4A	rs10911952	186868740	186868740	2.09892
CYP2E1	rs3737031	135368590	135368590	2.00727	missense_variant;PolyPhen:benign;SIFT:tolerated
PLA2G2A	rs11677	20301964	20301964	1.78595
CYP2C8	rs10509681	96798749	96798749	1.58553	missense_variant;PolyPhen:benign;SIFT:tolerated
PLA2G6	rs11570734	38518622	38518622	1.57333
PLA2G5	rs656110	20397240	20397240	1.4973
PLA2G4E	rs8029818	42310527	42310527	1.42389
Gene Set Name
KEGG: DRUG METABOLISM CYTOCHROME P450
Significant genes in the pathway/gene set
Associated Gene Name	Reference Id	Variant Start	Variant End	Association Value	Ensembl Annotation	Related eQTL Genes
CYP2C9	rs9332220	96743943	96743943	2.56463
CYP2C19	rs10786172	96581094	96581094	2.49255
CYP2C18	rs2860840	96495232	96495232	2.44672
FMO4	rs2207188	171379002	171379002	2.41794
CYP2A7	rs111390860	41383115	41383115	2.13721	missense_variant;PolyPhen:probably damaging;SIFT:deleterious
GSTM5	rs11807	110260742	110260742	2.05443		GSTM4
CYP2E1	rs3737031	135368590	135368590	2.00727	missense_variant;PolyPhen:benign;SIFT:tolerated
UGT1A10	rs1817154	234560591	234560591	1.97964
UGT1A8	rs1817154	234560591	234560591	1.97964
ADH1C	rs1693482	100263965	100263965	1.83803	missense_variant;PolyPhen:benign;SIFT:deleterious
CYP2B6	rs1552223	41525952	41525952	1.80576
UGT2A3	rs12648504	69787683	69787683	1.78173
ALDH1A3	rs10902583	101335775	101335775	1.7592
ALDH3B1	rs105147	67793014	67793014	1.7385
UGT1A4	rs45449995	234638580	234638580	1.70774	missense_variant;PolyPhen:possibly damaging;SIFT:deleterious
UGT1A3	rs45449995	234638580	234638580	1.70774	missense_variant;PolyPhen:possibly damaging;SIFT:deleterious
UGT1A7	rs45449995	234638580	234638580	1.70774	missense_variant;PolyPhen:possibly damaging;SIFT:deleterious
UGT1A6	rs45449995	234638580	234638580	1.70774	missense_variant;PolyPhen:possibly damaging;SIFT:deleterious
UGT1A5	rs45449995	234638580	234638580	1.70774	missense_variant;PolyPhen:possibly damaging;SIFT:deleterious
UGT1A9	rs45449995	234638580	234638580	1.70774	missense_variant;PolyPhen:possibly damaging;SIFT:deleterious
ADH4	rs6532798	100054827	100054827	1.68048
GSTA3	rs628263	52769856	52769856	1.67081
CYP2A6	rs7251418	41341589	41341589	1.5986		ADCK4
CYP2C8	rs10509681	96798749	96798749	1.58553	missense_variant;PolyPhen:benign;SIFT:tolerated
FMO3	rs2235192	171079549	171079549	1.54837
GSTM3	rs1055259	110276861	110276861	1.41816
UGT2A1	rs111696697	70512787	70512787	1.37448	stop_gained;PolyPhen:;SIFT:
ALDH3A1	rs887241	19645938	19645938	1.34544	missense_variant;PolyPhen:benign;SIFT:tolerated	ALDH3A2
ADH5	rs11547772	99992793	99992793	1.33923

## Sheet: Table6S
Table 6S. Class A SNPS (nominal p-value<0.01). Combined p-values have been calculated combining the 2 significant p-values by Fisher's method.
CHR	Position (hg19)	SNP	CLASS	A1	A2	MAF_AGE_MIN50	MAF_AGE_MAG50	MAF_CENT	GENE_NAME	Fisher_combined_Pval
1	70744507	rs12565719	A	C	A	0.2092	0.2493	0.2132	ANKRD13C	0.000137331
1	170141722	rs11585754	A	A	C	0.3495	0.4206	0.3784		2.35121e-05
1	203403981	rs12757606	A	G	A	0.4515	0.4903	0.4159		0.000218809
1	216987005	rs2576234	A	C	A	0.2653	0.3092	0.2447	ESRRG	6.7191e-07
1	216994412	rs2032028	A	A	G	0.2653	0.3092	0.2462	ESRRG	1.35613e-06
1	217005202	rs1436897	A	G	A	0.3559	0.3942	0.3288	ESRRG	2.01502e-05
1	217016670	rs2576258	A	C	A	0.2737	0.337	0.2651	ESRRG	4.14116e-05
1	237296231	rs10737813	A	G	A	0.4043	0.4526	0.4069	RYR2	0.00019598
2	2979113	rs1729916	A	A	G	0.3529	0.4148	0.3604	AC019118.2	0.000449611
2	55010193	rs6705079	A	G	A	0.4566	0.4847	0.4159	EML6	1.32573e-06
2	68229753	rs4671202	A	C	A	0.4324	0.4791	0.4459		0.000731747
2	234337940	rs7572257	A	A	G	0.0727	0.1017	0.07357	DGKD	0.000188097
2	239896861	rs10199914	A	G	A	0.3584	0.3955	0.3333		1.88446e-05
3	62064769	rs11130874	A	G	A	0.1543	0.2075	0.1652	PTPRG	0.000987184
4	92761582	rs1485988	A	A	G	0.4311	0.468	0.4339		0.000278806
4	97653130	rs1950166	A	A	G	0.3648	0.4288	0.3709		5.58854e-05
4	174447389	exm2269881	A	A	G	0.3814	0.4469	0.3814	HAND2	1.4138e-05
5	2604903	rs10512678	A	G	A	0.2143	0.2493	0.1982		0.00019405
5	106649834	rs252695	A	A	G	0.1633	0.2187	0.1581		0.000459625
5	133073611	rs1981608	A	A	G	0.3418	0.3914	0.3133		1.07836e-05
5	143412790	rs588129	A	A	G	0.09335	0.1476	0.09309		8.835e-05
5	144220904	rs12515080	A	A	G	0.1122	0.1546	0.09459		1.56916e-05
5	146767470	rs729530	A	G	A	0.2181	0.2883	0.2282	STK32A	0.00058516
7	140936468	rs1016665	A	G	A	0.1314	0.2019	0.1366	TMEM178B	4.46169e-05
7	150412100	rs1016193	A	A	G	0.2028	0.2827	0.2222	GIMAP1_GIMAP5	6.76308e-05
8	5538424	rs2527158	A	G	A	0.2207	0.273	0.2207		0.000201751
8	22553621	rs1008949	A	A	G	0.3839	0.4777	0.3919		0.000353132
8	111938504	kgp8603160	A	G	A	0.09949	0.1128	0.07508		0.000146246
8	138075823	rs7014510	A	A	C	0.1456	0.1518	0.08859		0.000157067
9	113244732	exm771713	A	A	C	0.06266	0.0961	0.06687	SVEP1	0.000118933
9	113940924	rs16936387	A	G	A	0.4579	0.4721	0.4309		0.000453681
9	114050929	rs10980855	A	G	A	0.1492	0.1908	0.1592		1.57196e-05
12	68847556	rs7977634	A	A	G	0.3163	0.3788	0.3138		9.78483e-05
12	68873722	rs6581826	A	A	C	0.3457	0.4178	0.3498		1.20622e-05
12	76390848	rs1967986	A	G	A	0.4107	0.461	0.3919		0.000362148
13	113301789	rs4907733	A	G	A	0.1777	0.2577	0.2087	ATP11AUN	8.37329e-05
14	76745121	rs4522353	A	G	A	0.4222	0.4972	0.4429		0.000273325
14	79187749	rs985956	A	G	A	0.3992	0.4318	0.3694	NRXN3	0.000374349
14	82291042	exm2272123	A	A	G	0.3444	0.4022	0.3213		0.000147129
14	82291042	rs7142425	A	A	G	0.3463	0.4011	0.3208		0.0001831
14	104805532	rs4906451	A	C	A	0.4043	0.4694	0.4099		0.000694164
15	59848502	rs7181219	A	A	C	0.2385	0.2577	0.1988		0.000457248
16	11481845	rs4076823	A	A	G	0.1505	0.1922	0.1396		0.00078399
16	88460931	rs8050582	A	A	G	0.2436	0.3053	0.2523		0.000159071
17	13771669	rs11078208	A	G	A	0.4082	0.4443	0.3889		0.00012165
18	55881103	rs482805	A	A	G	0.375	0.4596	0.3784	NEDD4L	0.000133309
19	48919939	rs276711	A	A	G	0.4158	0.4916	0.4309	GRIN2D	0.000109628
20	60964857	rs13043447	A	A	G	0.05867	0.1017	0.05856	RPS21	0.000809142
21	21861047	rs2826324	A	A	G	0.4018	0.4455	0.3709		0.000323167
22	50138633	rs139816	A	A	G	0.1709	0.2346	0.1742		0.000493173
23	95203910	rs2317474	A	G	A	0.3647	0.4279	0.3599		0.000147769

## Sheet: Table 7S
Table 7S. Class B SNPS (nominal p-value<0.01). Combined p-values have been calculated combining the 2 significant p-values by Fisher's method.
CHR	Position (hg19)	SNP	CLASS	A1	A2	MAF_AGE_MIN50	MAF_AGE_MAG50	MAF_CENT	GENE_NAME	Fisher_combined_Pval
1	171509327	exm123440	B	G	A	0.1952	0.1574	0.2117	PRRC2C	3.17405e-05
1	23766233	rs1077514	B	G	A	0.1556	0.1103	0.1396	ASAP3	0.00102103
1	57904853	rs11207036	B	G	A	0.301	0.234	0.3027	DAB1	0.000407372
1	102426168	rs17487709	B	A	G	0.2959	0.2716	0.3318	OLFM3	4.76285e-05
1	146556821	rs1867142	B	C	A	0.1633	0.11	0.1532		0.000215061
1	171519487	rs235470	B	A	C	0.1952	0.1574	0.2117	PRRC2C	3.17405e-05
1	171603547	rs235881	B	A	G	0.2742	0.2214	0.2913	MYOC	1.22083e-05
1	171478523	rs4384265	B	G	A	0.1952	0.1574	0.2117	PRRC2C	3.17405e-05
1	237369284	rs637520	B	G	A	0.4885	0.4276	0.494	RYR2	0.000339743
1	191429227	rs650957	B	A	G	0.4936	0.3969	0.47		2.32419e-05
1	81870764	rs7546194	B	A	G	0.4182	0.3858	0.4234		0.000473334
1	5880466	rs9308476	B	C	A	0.3138	0.2535	0.3138		0.000767673
2	47601106	exm192099	B	G	A	0.3814	0.3259	0.3844	EPCAM	7.26812e-06
2	54974485	exm2255414	B	G	A	0.4872	0.4399	0.482	EML6	9.92276e-05
2	54615526	exm2261282	B	G	A	0.398	0.3649	0.4339		0.000367925
2	47599283	rs10185866	B	G	A	0.2704	0.2019	0.2523	EPCAM	1.86031e-05
2	6523994	rs10208273	B	G	A	0.3061	0.3022	0.3498		0.000145903
2	128971040	rs13384737	B	G	A	0.3355	0.3008	0.3694		8.1908e-06
2	6478838	rs13403411	B	A	G	0.3457	0.3357	0.3874		0.000339512
2	119092344	rs13426749	B	G	A	0.08801	0.07103	0.1036		0.000364295
2	5219219	rs16863310	B	G	A	0.07015	0.04735	0.07207		1.86123e-05
2	34620100	rs17339245	B	G	A	0.4273	0.3747	0.4489		0.000246334
2	54846400	rs2941592	B	G	A	0.25	0.2006	0.2658	SPTBN1	3.58804e-06
2	47606774	rs3923559	B	G	A	0.3785	0.3134	0.3649	EPCAM	1.39263e-06
2	47612878	rs3924917	B	A	G	0.3151	0.2479	0.3033	EPCAM	5.33803e-06
2	5181373	rs4552162	B	A	G	0.1186	0.09331	0.1201		0.000151593
2	165701577	rs6724963	B	A	G	0.2168	0.1588	0.2342	AC019181.2	2.5344e-05
2	47673515	rs7602094	B	G	A	0.2564	0.1866	0.2402	MSH2	4.36759e-05
2	47740566	rs876937	B	G	A	0.3913	0.3287	0.3694		2.45457e-05
2	6494761	rs9287675	B	A	G	0.4898	0.468	0.482		5.33473e-05
3	179306775	exm365916	B	A	G	0.07908	0.05432	0.09159	ACTL6A	0.000379564
3	179322385	exm365939	B	C	A	0.07908	0.05432	0.09309	NDUFB5	0.000379564
3	63449206	rs2122797	B	A	G	0.2066	0.1741	0.2342	SYNPR	9.96763e-05
3	22939427	rs6795012	B	C	A	0.1343	0.09053	0.1471		0.0002172
4	39448586	exm395591	B	A	G	0.03954	0.03203	0.05271	KLB	0.000750795
4	10749071	rs10007887	B	A	G	0.264	0.2061	0.2673		0.000156822
4	61529037	rs10024649	B	A	C	0.04756	0.01955	0.04805		5.11281e-05
4	27162478	rs11940551	B	C	A	0.1582	0.1295	0.1742		0.00102103
4	97695401	rs12509878	B	C	A	0.4413	0.3928	0.4369		2.43762e-05
4	20097540	rs2322346	B	A	G	0.1901	0.1226	0.1787		3.89641e-05
4	185510238	rs6838378	B	G	A	0.3737	0.3078	0.3468		0.000148078
4	27139247	rs6853864	B	G	A	0.1684	0.1365	0.1907		0.000303738
4	61514117	rs7669975	B	A	C	0.03954	0.01253	0.03904		2.84093e-05
4	167655803	rs7695294	B	A	G	0.3555	0.3106	0.3709	SPOCK3	0.000365802
5	106589749	rs17159621	B	G	A	0.1543	0.1128	0.1517		8.6202e-06
5	106697023	rs6860893	B	A	G	0.4158	0.3663	0.4279		0.000176995
6	117844072	rs210648	B	A	G	0.365	0.3137	0.3976	DCBLD1	1.60693e-05
6	124907009	rs649757	B	A	G	0.04592	0.03203	0.05105	NKAIN2	3.68552e-05
6	34544384	rs6917350	B	A	G	0.2258	0.2008	0.2455		0.000316027
7	10856098	rs2057771	B	G	A	0.1837	0.156	0.2042		0.000246572
7	43864699	rs623108	B	A	G	0.3941	0.3398	0.3979		0.000296105
8	82437457	rs11994340	B	G	A	0.04464	0.02228	0.04955	FABP12	0.000318311
8	4468542	rs2725047	B	G	A	0.227	0.1811	0.2432	CSMD1	0.000299861
8	104337096	rs3808554	B	G	A	0.4196	0.383	0.452	FZD6	0.000296625
8	81364205	rs6998967	B	A	G	0.2283	0.2006	0.2387		1.68943e-05
8	81381871	rs7830160	B	A	G	0.3112	0.2618	0.3273		9.98921e-05
9	5346352	exm2259385	B	G	A	0.4413	0.3872	0.4595		5.42043e-05
9	106530763	rs10990941	B	A	G	0.3103	0.274	0.3303		5.78098e-05
9	5340596	rs1322220	B	G	A	0.4439	0.3886	0.4595	RLN1	4.76282e-05
9	93344344	rs690552	B	C	A	0.3661	0.3245	0.3679	RP11_555F9.2	0.000215219
9	106554028	rs7864801	B	A	G	0.3151	0.2758	0.3348		6.59718e-05
9	136414531	rs9696616	B	A	G	0.08929	0.05153	0.1021	ADAMTSL2	3.2413e-06
10	127133053	rs957416	B	G	A	0.2449	0.2103	0.2658		0.00025966
11	124189306	exm966298	B	A	G	0.1727	0.1348	0.2162	OR8D2	0.000115535
11	124189729	exm966323	B	A	G	0.1811	0.1421	0.2162	OR8D2	0.00027681
11	76415209	rs10899257	B	A	G	0.1569	0.1351	0.1547	GUCY2EP	0.000169547
11	36029527	rs11033374	B	C	A	0.3873	0.331	0.4012	LDLRAD3	0.000455786
11	131848924	rs11222856	B	A	G	0.3036	0.2674	0.3228	NTM	0.000835787
11	36028475	rs1322737	B	C	A	0.3538	0.2877	0.3709	LDLRAD3	0.000157281
11	34500687	rs1323690	B	A	G	0.426	0.3928	0.4474	ELF5	0.000249604
11	72181733	rs1429685	B	G	A	0.3559	0.3468	0.4039		0.000200655
11	124189729	rs2512219	B	A	G	0.1811	0.1421	0.2162	OR8D2	0.00027681
11	87174520	rs9804584	B	C	A	0.2436	0.2173	0.2688		0.000491496
12	127917085	rs10444466	B	A	C	0.2092	0.1643	0.2312		6.79326e-06
12	92916629	rs7980716	B	G	A	0.4069	0.3635	0.4835		1.44257e-08
13	44885589	rs17573850	B	G	A	0.2449	0.2374	0.2763		0.000136063
13	75264572	rs7334899	B	C	A	0.3406	0.2646	0.3529		0.000195102
13	75270057	rs9530368	B	C	A	0.3431	0.2668	0.3619		2.87375e-05
13	77418441	rs9544385	B	A	G	0.1862	0.1462	0.2087		4.19113e-05
13	77428151	rs9544390	B	A	G	0.2219	0.1741	0.2342		0.000278792
14	39260562	rs4432172	B	A	G	0.08163	0.06685	0.0991	LINC00639	0.000258545
14	39122375	rs7141696	B	G	A	0.3951	0.3259	0.4054		0.000306944
14	87902360	rs7146282	B	G	A	0.1952	0.1243	0.1742		0.00022901
14	33164433	rs7156205	B	G	A	0.486	0.4318	0.4865	AKAP6	0.000532045
15	95081853	rs12439138	B	A	G	0.1875	0.1699	0.2147		0.000435841
15	29855411	rs2337124	B	A	C	0.335	0.2423	0.3063	FAM189A1	4.4573e-05
15	78871288	rs680244	B	A	G	0.3491	0.2668	0.3514	CHRNA5	3.70825e-06
15	78841220	rs8053	B	A	G	0.3517	0.273	0.3453	PSMA4	6.29283e-05
16	19385455	rs7194414	B	A	G	0.1186	0.06825	0.1141		1.48532e-05
17	31610024	rs11080210	B	A	G	0.3329	0.2897	0.3514	ASIC2	0.000259011
17	54157181	rs11650687	B	C	A	0.3133	0.2682	0.3063		0.000624565
17	75114705	rs17533156	B	A	G	0.289	0.2201	0.2853	SEC14L1	5.64202e-05
17	7614601	rs7141	B	G	A	0.3469	0.2646	0.3453	EFNB3	1.20706e-05
17	54164935	rs9901788	B	G	A	0.3026	0.2612	0.3106		0.000214686
18	2187235	rs11080921	B	G	A	0.4949	0.4401	0.4985		0.000294277
18	42104904	rs12454511	B	A	G	0.1798	0.1351	0.1892	LOC101927921	0.000495232
18	68848130	rs17083850	B	G	A	0.03827	0.01397	0.03313		8.34795e-05
18	28927507	rs4239366	B	G	A	0.4974	0.4471	0.4685	DSG1	6.19801e-05
18	11307693	rs457329	B	A	G	0.09694	0.06964	0.1036		0.000770255
18	10787465	rs4797483	B	G	A	0.1531	0.1114	0.1562	PIEZO2	0.000386482
20	20484043	rs2273528	B	G	A	0.04337	0.02228	0.04955	RALGAPA2	0.000305907
20	20694965	rs6047006	B	G	A	0.04337	0.02228	0.04805	RALGAPA2	0.000424809
20	20629798	rs6075686	B	A	C	0.04464	0.02228	0.04805	RALGAPA2	0.000214138
20	20546572	rs6082051	B	G	A	0.04209	0.02235	0.04955	RALGAPA2	0.000323232
20	20984510	rs6113100	B	G	A	0.4796	0.3928	0.476		0.000189376
21	43682686	rs225385	B	G	A	0.463	0.4039	0.4505	ABCG1	0.000313706
23	122970459	rs3005850	B	G	A	0.2977	0.2303	0.2932		0.000118329

## Sheet: Table8S
Table 8S. Effect of rs3923559, rs3924917, rs1126497, rs10185866 on the expression of the sorrounding genes in different tissues according to GTExportal.
Gencode Id	Gene Symbol	SNP Id	P-Value	Effect Size	Tissue
ENSG00000095002.8	MSH2	rs3923559	1.7e-10	0.28	Adipose - Subcutaneous
ENSG00000095002.8	MSH2	rs3923559	3.9e-07	0.18	Lung
ENSG00000095002.8	MSH2	rs3923559	1.4e-06	0.24	Artery - Tibial
ENSG00000095002.8	MSH2	rs3923559	4.1e-06	0.25	Nerve - Tibial
ENSG00000095002.8	MSH2	rs3923559	2.1e-05	0.24	Adipose - Visceral (Omentum)
ENSG00000095002.8	MSH2	rs3923559	2.7e-05	0.17	Cells - Transformed fibroblasts
ENSG00000119888.6	EPCAM	rs3923559	3.4e-05	0.43	Heart - Left Ventricle
ENSG00000095002.8	MSH2	rs3923559	3.4e-05	0.28	Artery - Aorta
ENSG00000095002.8	MSH2	rs3924917	1.2e-12	0.31	Adipose - Subcutaneous
ENSG00000095002.8	MSH2	rs3924917	7.4e-11	0.24	Lung
ENSG00000095002.8	MSH2	rs3924917	1.1e-09	0.29	Artery - Tibial
ENSG00000095002.8	MSH2	rs3924917	3.5e-09	0.35	Adipose - Visceral (Omentum)
ENSG00000095002.8	MSH2	rs3924917	1.9e-08	0.36	Esophagus - Muscularis
ENSG00000095002.8	MSH2	rs3924917	2e-08	0.38	Artery - Aorta
ENSG00000095002.8	MSH2	rs3924917	6.6e-08	0.28	Nerve - Tibial
ENSG00000095002.8	MSH2	rs3924917	2.8e-07	0.22	Cells - Transformed fibroblasts
ENSG00000095002.8	MSH2	rs3924917	1.3e-05	0.25	Breast - Mammary Tissue
ENSG00000095002.8	MSH2	rs10185866	1.1e-14	0.31	Lung
ENSG00000095002.8	MSH2	rs10185866	2.9e-14	0.36	Adipose - Subcutaneous
ENSG00000095002.8	MSH2	rs10185866	1e-12	0.46	Adipose - Visceral (Omentum)
ENSG00000095002.8	MSH2	rs10185866	6.8e-12	0.4	Nerve - Tibial
ENSG00000095002.8	MSH2	rs10185866	1.2e-11	0.36	Artery - Tibial
ENSG00000095002.8	MSH2	rs10185866	1.1e-10	0.47	Esophagus - Muscularis
ENSG00000095002.8	MSH2	rs10185866	5.7e-09	0.43	Artery - Aorta
ENSG00000095002.8	MSH2	rs10185866	3.2e-08	0.33	Breast - Mammary Tissue
ENSG00000095002.8	MSH2	rs10185866	4.4e-08	0.25	Cells - Transformed fibroblasts
ENSG00000095002.8	MSH2	rs10185866	2.5e-07	0.56	Artery - Coronary
ENSG00000095002.8	MSH2	rs10185866	8.4e-07	0.5	Esophagus - Gastroesophageal Junction
ENSG00000095002.8	MSH2	rs10185866	4.8e-06	0.3	Colon - Transverse
ENSG00000234690.2	AC073283.4	rs10185866	5e-05	0.32	Adipose - Subcutaneous
ENSG00000095002.8	MSH2	rs1126497	2e-10	0.28	Adipose - Subcutaneous
ENSG00000095002.8	MSH2	rs1126497	1.7e-07	0.19	Lung
ENSG00000095002.8	MSH2	rs1126497	3.1e-06	0.24	Artery - Tibial
ENSG00000095002.8	MSH2	rs1126497	8.6e-06	0.24	Nerve - Tibial
ENSG00000095002.8	MSH2	rs1126497	2.5e-05	0.25	Adipose - Visceral (Omentum)
ENSG00000095002.8	MSH2	rs1126497	5.6e-05	0.17	Cells - Transformed fibroblasts

## Sheet: Tables 9S
Table 9S. Class C SNPS (nominal p-value<0.01). Combined p-values have been calculated combining the 2 significant p-values by Fisher's method.
CHR	Position (hg19)	SNP	CLASS	A1	A2	MAF_AGE_MIN50	MAF_AGE_MAG50	MAF_CENT	GENE_NAME	Fisher_combined_Pval
1	38651608	rs10889449	C	A	G	0.3376	0.3942	0.4024		0.000213244
1	60023941	rs1440575	C	A	G	0.4503	0.4666	0.4444	FGGY	0.000131042
1	63503606	rs6694848	C	G	A	0.3954	0.4331	0.4429		0.000159981
1	105190881	rs958515	C	A	G	0.4783	0.4889	0.47		3.47845e-05
1	110215178	rs655315	C	A	G	0.4897	0.4915	0.4985	GSTM2	0.00017713
1	199102610	rs322875	C	A	G	0.4541	0.5	0.4715		0.000221272
1	203351887	rs7540920	C	A	C	0.2115	0.2746	0.2756		9.42706e-08
1	203352061	rs10920623	C	G	A	0.1543	0.2201	0.2177		8.31887e-07
1	203365232	rs10800925	C	A	G	0.4133	0.4721	0.4535		4.04149e-06
1	209728590	rs10746420	C	G	A	0.3954	0.4554	0.491		3.81629e-05
1	213311427	rs6657234	C	A	G	0.2615	0.2883	0.2853	RPS6KC1	5.06153e-05
1	213371127	rs1391549	C	G	A	0.2577	0.2855	0.2808	RPS6KC1	8.50679e-05
1	216172380	exm149177	C	G	A	0.4579	0.4833	0.4895	USH2A	2.39594e-06
1	216172380	rs10864219	C	G	A	0.4579	0.4833	0.4895	USH2A	2.39594e-06
1	216188698	rs10779662	C	C	A	0.4145	0.4568	0.4474	USH2A	3.77395e-06
2	15731605	rs4668936	C	G	A	0.3597	0.4025	0.4309	DDX1	0.000151014
2	23711564	rs10490750	C	G	A	0.2105	0.234	0.2297	KLHL29	0.000736598
2	24369019	rs6754391	C	A	G	0.3304	0.3942	0.4039	FAM228B	1.72471e-06
2	24390517	exm176676	C	G	A	0.3214	0.3774	0.3724	FAM228B	0.000267196
2	24391129	rs6723257	C	A	G	0.3197	0.3743	0.3724	FAM228B	0.000355921
2	24468132	rs4665675	C	A	G	0.3581	0.4387	0.4339	ITSN2	3.13103e-05
2	24524958	exm176922	C	A	G	0.2946	0.3663	0.3739	ITSN2	0.000149069
2	24563646	exm2265124	C	A	G	0.361	0.4373	0.4369	ITSN2	6.56677e-05
2	34974141	rs11683299	C	G	A	0.3138	0.3719	0.3724		0.000366446
2	41540474	rs12712747	C	C	A	0.477	0.4804	0.485		2.66262e-05
2	41718641	rs10175292	C	A	C	0.3163	0.3496	0.3453		3.57422e-06
2	41758888	rs4468861	C	A	G	0.338	0.3565	0.3483		2.55067e-05
2	41802979	rs6544449	C	A	G	0.3478	0.3691	0.3694		9.60585e-05
2	47067214	rs17774013	C	A	G	0.2258	0.2933	0.2718	LINC01119	8.8085e-05
2	47073260	rs17774133	C	A	G	0.2194	0.2723	0.2733	LINC01119	0.000224221
2	86135154	exm2265168	C	G	A	0.301	0.3366	0.3574		0.000451023
2	87042825	exm208764	C	G	A	0.102	0.1323	0.1366	CD8B	4.18341e-05
2	105792850	rs2679870	C	A	G	0.07398	0.08914	0.0991		5.59533e-05
2	137981675	rs2196346	C	A	C	0.4592	0.4805	0.4835	THSD7B	0.000268381
2	156496507	rs707120	C	A	G	0.2589	0.3162	0.3213		6.78612e-05
2	182024283	rs6738120	C	A	G	0.1429	0.1574	0.1562		0.000865367
2	185287387	rs1443029	C	G	A	0.1569	0.1811	0.1757		2.06632e-06
2	209603868	rs9808141	C	A	G	0.3967	0.4582	0.4474		2.866e-05
2	209720180	rs4459678	C	A	G	0.1952	0.2549	0.2312		4.33872e-06
2	222183997	exm2255019	C	A	G	0.3686	0.4206	0.3994		0.000207014
2	240507331	rs2008714	C	G	A	0.2844	0.3301	0.3243		0.000201276
2	241626057	rs10804412	C	A	G	0.3444	0.4025	0.4204		5.29675e-05
2	241643273	rs4676380	C	C	A	0.2934	0.3538	0.3468		0.000158284
3	8694057	rs3774209	C	A	C	0.3763	0.3785	0.3994	SSUH2	0.000738453
3	24483794	rs9831450	C	G	A	0.3159	0.3565	0.3784	THRB	0.000143812
3	25388313	rs12497123	C	A	C	0.139	0.1922	0.1772	RARB	0.000360959
3	38052804	exm299912	C	A	G	0.0523	0.08217	0.07357	PLCD1	0.000632155
3	60587580	rs11712757	C	A	G	0.3949	0.4359	0.4502	FHIT	3.60148e-05
3	60733152	rs3920477	C	C	A	0.4718	0.4805	0.4849	FHIT	8.03923e-05
3	82596134	rs1463336	C	A	G	0.2398	0.2709	0.2372		0.000199573
3	83700741	kgp1853869	C	C	A	0.08355	0.1176	0.1099		9.28415e-05
3	83842624	rs11127824	C	A	G	0.2877	0.3468	0.3348		0.000598047
3	83952437	rs4568144	C	A	G	0.4362	0.4652	0.494		3.40492e-05
3	117137202	rs6777348	C	A	G	0.2028	0.2632	0.2748		3.89398e-05
3	117141815	rs9847858	C	G	A	0.3469	0.4331	0.4054		2.06763e-05
3	141867638	rs6771905	C	G	A	0.2028	0.2159	0.2252	TFDP2	6.03306e-05
3	153640591	rs10513453	C	A	G	0.1033	0.1393	0.1366		3.55301e-06
3	153755820	rs4256090	C	A	C	0.1964	0.2507	0.2492	ARHGEF26_AS1	5.6131e-05
3	153779868	rs17817774	C	G	A	0.08673	0.1337	0.1126	ARHGEF26_AS1	3.15849e-05
3	153839866	exm359878	C	C	G	0.08036	0.1212	0.1051	ARHGEF26	4.0925e-05
3	178386451	rs11921195	C	C	A	0.2946	0.3245	0.3063	KCNMB2	0.000414899
3	191081486	rs9868286	C	C	A	0.1722	0.2214	0.2147	CCDC50	4.1869e-06
3	191087259	rs4677726	C	G	A	0.2666	0.3273	0.3108	CCDC50	5.30529e-06
3	191093053	rs2028572	C	G	A	0.3508	0.4039	0.3919	CCDC50	0.000843696
3	191093310	exm372660	C	G	A	0.3508	0.4039	0.3919	CCDC50	0.000843696
3	192948186	rs2276723	C	A	G	0.3074	0.3492	0.3559		2.28267e-05
4	10836045	rs16873628	C	C	A	0.4707	0.4944	0.491		0.000150048
4	21910553	rs4277766	C	A	G	0.1633	0.2047	0.2177	KCNIP4	3.26456e-05
4	22222487	rs11730240	C	G	A	0.1607	0.2061	0.2252		0.000605833
4	22266680	rs4285070	C	G	A	0.1531	0.2033	0.2222		0.000758426
4	24310076	rs6815672	C	G	A	0.2806	0.2994	0.2943		3.0248e-06
4	55814774	rs11722442	C	A	G	0.3852	0.3886	0.4069		0.000123206
4	58960389	rs17290180	C	C	A	0.2538	0.2604	0.2492		0.000164264
4	73431464	rs12645174	C	A	G	0.3878	0.4123	0.3994	ADAMTS3	0.000260498
4	73433875	rs1518492	C	G	A	0.3916	0.415	0.3994	ADAMTS3	0.000172282
4	73454114	rs719382	C	A	G	0.3517	0.3673	0.3559		1.88567e-05
4	73455382	rs13104467	C	A	G	0.389	0.4123	0.4039		0.000185441
4	73470972	exm2269774	C	G	A	0.3929	0.4164	0.4084		0.000195106
4	73472941	exm2269933	C	G	A	0.4388	0.4485	0.4354		0.000371306
4	73506817	rs1401144	C	A	G	0.3801	0.3955	0.3799		8.51378e-05
4	73527617	rs9784530	C	A	G	0.4031	0.4067	0.4009		1.34683e-05
4	77523129	rs17322390	C	A	G	0.4171	0.454	0.4444	SHROOM3	6.39793e-05
4	77551310	rs7695340	C	A	G	0.463	0.4972	0.497	SHROOM3	3.25571e-05
4	90373071	rs772494	C	A	G	0.398	0.4429	0.4309		0.000736948
4	99892196	rs1230190	C	C	A	0.125	0.1471	0.1547		0.00010378
4	99983312	rs1238741	C	G	A	0.102	0.1184	0.1141	METAP1	0.00066696
4	109841743	rs17596705	C	A	G	0.1582	0.1866	0.1817	COL25A1	0.000159365
4	129825629	rs186444	C	A	G	0.2755	0.3106	0.3258	SCLT1	0.000132982
4	129838879	rs318549	C	G	A	0.2755	0.312	0.3258	SCLT1	0.000113832
4	130056276	rs234264	C	A	G	0.3223	0.3547	0.3589		0.000115101
4	130130312	rs488685	C	G	A	0.4589	0.493	0.4759		1.88283e-05
4	130464486	rs1074762	C	A	G	0.1301	0.1546	0.1592		2.40994e-05
4	166960363	rs17590344	C	G	A	0.4795	0.4861	0.4955	TLL1	0.000233319
4	170872226	rs10008105	C	G	A	0.4349	0.4861	0.455	RP11_205M3.3	1.83061e-05
4	172388728	exm2265893	C	G	A	0.2054	0.2117	0.2177		5.27231e-06
4	172388728	rs7664076	C	G	A	0.2054	0.2117	0.2177		5.27231e-06
4	184530109	rs13118994	C	G	A	0.2577	0.2911	0.2643		8.38487e-05
4	187815647	rs397321	C	A	G	0.1798	0.2047	0.2147		5.02696e-05
4		rs7697556	C	A	G	0.4337	0.4443	0.4264		0.00102103
5	1517322	rs2963279	C	C	A	0.4514	0.4846	0.491	LPCAT1	0.000365327
5	2947877	rs2934528	C	C	A	0.3916	0.461	0.4535		0.000432063
5	10738444	rs267957	C	A	G	0.08163	0.08774	0.09159	DAP	0.000308502
5	11343384	rs32128	C	A	G	0.2883	0.3245	0.3273	CTNND2	3.80782e-05
5	31049958	rs11749998	C	A	G	0.3112	0.3273	0.3483		7.40305e-05
5	50523369	rs7716272	C	G	A	0.4668	0.4791	0.464		0.000117774
5	50636521	rs9291750	C	C	A	0.1518	0.2075	0.2027		6.57409e-05
5	50659788	rs4865656	C	A	G	0.3273	0.3869	0.3844		0.000527594
5	50695877	rs6895297	C	A	G	0.3278	0.3869	0.3844		0.000551415
5	50734670	rs16875094	C	G	A	0.1607	0.2117	0.2147		0.000108823
5	84003689	rs10076429	C	A	C	0.202	0.227	0.2402		0.000446344
5	90209824	rs10074525	C	G	A	0.2283	0.2674	0.2786	GPR98	0.000855714
6	1760556	rs3800036	C	G	A	0.399	0.4499	0.4369	GMDS	0.000306148
6	36126650	rs2213661	C	G	A	0.3954	0.4485	0.4234		0.000669446
6	131789736	rs2608935	C	A	G	0.162	0.1825	0.1802		0.000770011
6	144116036	rs2328516	C	A	G	0.1893	0.2326	0.2417	PHACTR2	0.000310876
6	152382382	rs2207396	C	A	G	0.1913	0.2187	0.2718	ESR1	5.78111e-05
6	156792873	rs9372001	C	G	A	0.1747	0.1978	0.2057		0.0007086
7	16846146	rs1459564	C	A	G	0.3112	0.3621	0.3664	AGR2	4.6902e-06
7	16847745	rs706078	C	G	A	0.4528	0.4986	0.4955		0.000416233
7	36729951	rs6462691	C	G	A	0.4694	0.4958	0.4985	AOAH	0.000335989
7	53915632	rs7797182	C	G	A	0.3673	0.4136	0.4249		5.4421e-05
7	54051462	rs12666229	C	A	G	0.4082	0.4499	0.4535		3.75099e-05
7	54051865	rs11979191	C	C	A	0.3724	0.4164	0.4084		1.37244e-05
7	70558485	rs10950240	C	A	G	0.4247	0.4805	0.4775		0.000153323
7	78470511	rs554380	C	A	G	0.1824	0.2214	0.2402	MAGI2	0.000174257
7	82147302	rs10486963	C	A	G	0.2959	0.3705	0.3619		4.36223e-06
7	82153240	rs6971119	C	A	G	0.2615	0.3217	0.3303		9.21023e-05
7	138098677	rs4732315	C	A	G	0.3192	0.3589	0.3604		0.000650457
7	150200185	rs7796182	C	A	G	0.1811	0.2214	0.2402		0.000583517
7	150476888	rs7806458	C	G	A	0.2883	0.344	0.3213		0.000594052
7	158276926	rs7810884	C	A	G	0.2436	0.2849	0.2838	PTPRN2	0.000248676
8	893453	rs11137112	C	G	A	0.1633	0.1838	0.2057	ERICH1_AS1	0.000520087
8	5397094	rs1557982	C	A	G	0.3265	0.3482	0.3514		7.14183e-05
8	10468172	exm681396	C	G	A	0.2781	0.3301	0.3363	RP1L1	0.000232754
8	18679795	rs4921964	C	A	C	0.4282	0.4958	0.4623	PSD3	2.47202e-05
8	83007997	rs10102998	C	A	C	0.2156	0.2563	0.2598		0.000531582
8	138935483	rs2668109	C	G	A	0.2755	0.3106	0.3018		0.000377423
9	791067	rs10758904	C	C	A	0.4209	0.4708	0.4685		0.000118426
9	816742	rs4742429	C	A	G	0.1033	0.1351	0.1532		0.000158587
9	7000769	rs2792238	C	G	A	0.4464	0.4944	0.4865	KDM4C	0.000205453
9	16256964	rs7040587	C	A	G	0.2385	0.2688	0.2568	C9orf92	0.000311981
9	18853327	rs11791292	C	C	A	0.1008	0.1072	0.08559	ADAMTSL1	3.35366e-06
9	27193847	rs578327	C	G	A	0.1735	0.2214	0.2117	TEK	0.000247792
9	81394990	rs10867272	C	G	A	0.1378	0.1825	0.1426		4.15781e-06
9	85117420	rs955975	C	A	G	0.176	0.2298	0.2222		0.000559012
9	85126163	exm2259454	C	G	A	0.2959	0.351	0.3483		0.000237431
9	89854595	rs7862236	C	C	A	0.412	0.4847	0.4789		0.000207251
9	91337035	rs7042278	C	A	G	0.2603	0.2961	0.3018		2.47221e-05
9	94458669	rs12348947	C	G	A	0.2187	0.2382	0.2372		0.000148806
9	101270230	rs13295101	C	G	A	0.4107	0.4206	0.4189	GABBR2	7.44443e-05
9	101308111	rs1999498	C	G	A	0.4337	0.4485	0.461	GABBR2	0.000133155
9	116553683	rs7030473	C	A	G	0.3508	0.3844	0.3784		3.68385e-05
9	119181214	rs4837514	C	G	A	0.375	0.3942	0.4294		0.000195994
9	135120155	rs914418	C	G	A	0.3077	0.3567	0.3619	NTNG2	0.000312309
10	8018046	rs11255468	C	G	A	0.375	0.4318	0.4219	TAF3	4.79001e-05
10	8449327	rs10905357	C	G	A	0.2449	0.2772	0.2778		2.06636e-05
10	27343232	rs4749219	C	A	G	0.3227	0.3315	0.3258	ANKRD26	0.000523305
10	28025771	rs10508727	C	A	G	0.03061	0.05989	0.06757	MKX	0.000415094
10	28738098	rs6481523	C	A	G	0.1888	0.2173	0.2162		0.000365998
10	34631239	rs2384211	C	G	A	0.4413	0.4916	0.479	PARD3	2.35503e-05
10	42893353	rs2505847	C	G	A	0.2669	0.3372	0.3313		2.62628e-07
11	702250	rs7479861	C	A	G	0.4284	0.4791	0.4835	TMEM80	9.81111e-06
11	4404192	rs2052731	C	G	A	0.1352	0.1448	0.1742	TRIM21	0.000152938
11	5344592	exm882508	C	C	A	0.1441	0.1616	0.1712	OR51B2	0.00021175
11	42566600	rs10768832	C	A	C	0.09949	0.1365	0.1426		0.000101194
11	73713591	rs1685354	C	G	A	0.227	0.2591	0.2613	UCP3	0.00026456
11	92646254	rs2242342	C	A	G	0.148	0.2256	0.1937		1.87681e-06
11	92648639	rs10501800	C	G	A	0.3342	0.3897	0.3859		0.000115627
11	101616696	rs12223480	C	C	A	0.2181	0.2284	0.2417		0.000372243
11	101753183	rs724569	C	C	A	0.2462	0.2521	0.2651		6.79107e-05
11	102259947	exm2259678	C	G	A	0.4171	0.4861	0.4925		7.38288e-06
11	107706832	rs566238	C	A	G	0.398	0.4694	0.476	SLC35F2	0.000145892
11	107729106	rs488512	C	A	G	0.324	0.3955	0.4189	SLC35F2	1.08511e-05
11	114189367	rs1941397	C	G	A	0.4335	0.4443	0.4715		0.000109043
11	131046615	rs1946041	C	A	C	0.4056	0.4443	0.4399		7.33918e-05
11	133101524	rs12418625	C	G	A	0.3839	0.4206	0.4129	OPCML	0.000169462
11	134054089	rs7131644	C	C	A	0.1786	0.227	0.2057	NCAPD3	0.000379322
12	776471	rs7298096	C	G	A	0.4566	0.4958	0.4745		0.000654046
12	4984601	rs2041377	C	A	G	0.176	0.2033	0.2162		0.000231696
12	30384308	rs1485420	C	G	A	0.273	0.2967	0.2898		0.000184891
12	30389264	rs10771674	C	A	C	0.2704	0.2953	0.2898		0.00021822
12	30469203	rs1896909	C	A	G	0.3112	0.3468	0.3483		0.000209242
12	45933519	rs7303050	C	A	G	0.3508	0.3942	0.3859		8.72992e-05
12	57228257	rs4759032	C	G	A	0.2181	0.2242	0.2432		0.000495559
12	58748272	rs997230	C	A	G	0.3581	0.3844	0.3889		0.000160017
12	74429110	rs1829127	C	G	A	0.3954	0.4666	0.4279		9.20077e-05
12	74471340	rs2303970	C	A	G	0.4247	0.4471	0.4294		0.000164668
12	95742114	rs2367306	C	A	C	0.3227	0.3593	0.3574		0.000177436
12	96399869	rs2540499	C	A	C	0.1811	0.2214	0.2117	LTA4H	0.00024656
12	97855084	rs12227359	C	A	G	0.1722	0.2298	0.2508		0.000156193
12	104444423	rs1038497	C	A	C	0.2117	0.2465	0.2447	GLT8D2	9.84909e-05
12	118145683	rs10744901	C	G	A	0.3163	0.344	0.3348	KSR2	0.000755726
12	118376918	rs11068751	C	A	G	0.3865	0.454	0.4369	KSR2	0.000175654
12	130596396	rs7137346	C	G	A	0.4452	0.5	0.4865		8.42421e-05
12		rs7960483	C	C	A	0.3546	0.3942	0.3859		0.00102103
13	38363047	exm2260199	C	A	G	0.3125	0.3259	0.3168	TRPC4	0.000419162
13	43491848	rs12863816	C	A	G	0.1594	0.1866	0.1922	EPSTI1	0.000390275
13	70917167	rs9572434	C	G	A	0.4322	0.4972	0.491		7.78416e-05
13	79417832	exm2267546	C	G	A	0.3839	0.4359	0.4234		1.26352e-07
13	106446477	rs2025924	C	G	A	0.2755	0.3189	0.3048		0.000266181
13	108328177	rs1935135	C	G	A	0.324	0.3329	0.3318	FAM155A	3.68819e-05
13	108465699	rs9555411	C	G	A	0.4235	0.4359	0.4324	FAM155A	0.000187467
14	21108457	rs12881517	C	G	A	0.4105	0.4538	0.455	OR6S1	3.77388e-05
14	21109141	exm1085261	C	A	G	0.389	0.4331	0.4324	OR6S1	9.52487e-06
14	21109385	exm1085281	C	G	A	0.4094	0.4513	0.455	OR6S1	4.37788e-05
14	21109726	exm1085300	C	G	A	0.389	0.4331	0.4309	OR6S1	9.52487e-06
14	21109726	rs11622794	C	G	A	0.389	0.4331	0.4309	OR6S1	9.52487e-06
14	22782377	exm2260295	C	A	G	0.1594	0.1936	0.2063		9.18622e-05
14	36454651	rs4982322	C	A	C	0.1301	0.1504	0.1456		5.79537e-06
14	37211485	rs1033593	C	G	A	0.4681	0.4749	0.4895	SLC25A21	1.75853e-05
14	42927117	rs4417482	C	A	G	0.3686	0.3872	0.3979		0.000483603
14	84730585	rs11159642	C	A	G	0.4158	0.4624	0.452		0.000479893
14	84734690	rs11844142	C	G	A	0.1849	0.2577	0.2282		1.31834e-06
14	84751541	rs8019836	C	G	A	0.2245	0.2841	0.2553		4.04984e-05
14	85175316	rs2765912	C	A	G	0.3312	0.3524	0.3619		0.000177272
14	98724414	rs10148368	C	A	G	0.3265	0.3858	0.3829		0.000158125
14	99474165	rs1565611	C	G	A	0.4719	0.4804	0.5		0.000425666
14	79945162	rs10146997	C	G	A	0.1594	0.1713	0.1742	NRXN3	0.00102103
15	50232552	rs7173644	C	G	A	0.477	0.4944	0.497	ATP8B4	0.0003628
15	50265334	rs6493392	C	A	G	0.4434	0.4735	0.488	ATP8B4	8.46839e-07
15	50276945	rs6493393	C	A	G	0.4617	0.4694	0.482	ATP8B4	0.000400223
15	50293390	rs11632984	C	G	A	0.2742	0.3106	0.3453	ATP8B4	5.23e-06
15	50297463	rs8041864	C	G	A	0.3852	0.4373	0.4505	ATP8B4	7.36069e-05
15	50307416	rs2899446	C	G	A	0.324	0.3858	0.3784	ATP8B4	6.41723e-06
15	50320678	rs11854435	C	G	A	0.3584	0.4011	0.4309	ATP8B4	6.13723e-06
15	50384213	rs11631945	C	A	G	0.4337	0.4958	0.494	ATP8B4	1.5168e-05
15	50416551	rs8038609	C	A	G	0.4196	0.4638	0.4655		0.000276931
15	54262714	rs2725580	C	G	A	0.3878	0.4443	0.4384		7.28592e-05
15	54268002	rs2725585	C	A	G	0.3865	0.4276	0.4429		4.42374e-06
15	71587373	rs3743111	C	G	A	0.3853	0.4396	0.4505	THSD4	0.000279284
15	99690051	rs1703762	C	A	G	0.2041	0.2674	0.2703	TTC23	0.000126334
16	7991865	rs12931427	C	A	G	0.2321	0.2437	0.2462		0.000249851
16	8866582	rs9937726	C	A	G	0.06378	0.0766	0.08408	ABAT	0.00026037
16	9822300	rs8056965	C	A	C	0.1263	0.1421	0.1486		0.000424124
16	13000814	rs1077970	C	G	A	0.477	0.4902	0.4789	SHISA9	2.39255e-05
16	55304203	rs4784510	C	G	A	0.2347	0.2507	0.2364		0.000308866
16	86325854	rs13337856	C	A	G	0.4885	0.4889	0.4745	RP11_514D23.1	3.59367e-05
17	2554064	rs6502440	C	A	G	0.2564	0.2869	0.2628	PAFAH1B1	6.26982e-05
17	38191924	rs6503534	C	G	A	0.1752	0.2169	0.2057	MED24	8.1716e-06
17	39707898	rs897414	C	G	A	0.3141	0.3426	0.3604	LINC00974	0.000379372
17	39720391	rs7209138	C	A	C	0.4235	0.461	0.4835	KRT9	0.000380083
17	42045212	rs1642598	C	G	A	0.2513	0.2925	0.2688	PYY	0.000172195
17	75839026	rs8080480	C	A	G	0.3661	0.4248	0.4189		2.87561e-05
17	81049726	rs4986109	C	G	A	0.2564	0.3106	0.3153	METRNL	4.7443e-05
18	29967333	rs16963287	C	G	A	0.1135	0.156	0.1577	GAREM	0.000411575
18	37281414	rs630228	C	A	C	0.1288	0.1435	0.1562	LINC00669	0.000104421
18	51486832	rs11660673	C	A	G	0.1327	0.163	0.1562		0.000722347
18	70301401	rs9807526	C	A	G	0.3329	0.4106	0.4114		0.000298999
18	71100945	rs1942781	C	A	G	0.1735	0.2214	0.2207		0.000387639
18	72955102	rs4891051	C	A	G	0.1939	0.2423	0.2297	TSHZ1	2.3634e-05
18	77373296	rs506246	C	A	C	0.4209	0.4568	0.4625		0.000524286
19	53043275	rs607477	C	G	A	0.2564	0.2827	0.2958	ZNF808	0.000371274
19	57223816	rs4801364	C	A	G	0.3622	0.3649	0.3649		0.000156232
19	57224390	rs730845	C	A	C	0.2717	0.2855	0.2778		0.000597457
20	17879866	rs6105835	C	G	A	0.3737	0.4276	0.4607		1.9271e-05
20	21949593	rs6106434	C	A	G	0.398	0.4304	0.4369		0.000152295
20	36148497	rs3795148	C	A	G	0.2883	0.3398	0.363	BLCAP	2.28621e-05
20	43724879	rs6017486	C	A	G	0.2615	0.2855	0.3123	KCNS1	0.000566774
20	43926536	rs2227274	C	A	C	0.1709	0.2298	0.2192	MATN4	0.000555553
20	43926573	exm1544330	C	A	G	0.1709	0.2298	0.2192	MATN4	0.000555553
21	28406107	rs2849977	C	G	A	0.4375	0.4554	0.467		0.00024965
21	28419053	rs633502	C	A	G	0.4413	0.4833	0.473		0.000436854
21	46057720	exm1578304	C	C	A	0.2207	0.2855	0.2801	TSPEAR	3.13952e-05
21	46060222	rs9978560	C	A	G	0.148	0.188	0.1937	TSPEAR	7.33789e-05
22	27381346	rs2157465	C	A	G	0.4452	0.4708	0.4895		1.72029e-05
22	27507131	rs738164	C	G	A	0.3214	0.3287	0.3393		3.14566e-05
22	28017801	rs5752599	C	A	G	0.3699	0.4164	0.4174		0.000108475
22	37534034	rs2284033	C	A	G	0.3571	0.3802	0.3964	IL2RB	3.96843e-05
22	39497452	exm1609541	C	G	A	0.4043	0.4373	0.4595	APOBEC3H	0.000184011
22	39497454	exm1609542	C	C	G	0.4043	0.4373	0.4595	APOBEC3H	0.000184011
22	39498038	exm1609556	C	C	G	0.3916	0.4262	0.4505	APOBEC3H	0.000123365
22	39499763	rs139316	C	G	A	0.3916	0.4248	0.4489	APOBEC3H	0.00016074
23	13388971	rs1015560	C	C	A	0.2405	0.277	0.2542		0.000346401
23	144974437	rs4554623	C	A	G	0.3267	0.3885	0.3881		0.000216935

## Sheet: Table10S
Table 10S. Class D SNPS (nominal p-value<0.01). Combined p-values have been calculated combining the 2 significant p-values by Fisher's method.
CHR	Position (hg19)	SNP	CLASS	A1	A2	MAF_AGE_MIN50	MAF_AGE_MAG50	MAF_CENT	GENE_NAME	Fisher_combined_Pval
1	3493850	rs2821054	D	C	A	0.2519	0.2173	0.2147	MEGF6	3.60573e-05
1	3500575	rs2995009	D	G	A	0.2532	0.2201	0.2147	MEGF6	0.000541878
1	3575929	rs10910003	D	A	G	0.1798	0.1407	0.1517	TP73	0.000235
1	18821416	rs6686713	D	C	A	0.3686	0.3217	0.3168		4.02511e-06
1	24484108	exm32146	D	A	G	0.07143	0.0585	0.06006	IFNLR1	0.000442166
1	28299346	rs12565238	D	A	G	0.03699	0.01532	0.02853	EYA3	8.15471e-05
1	53978119	rs6588480	D	A	G	0.1722	0.1407	0.1502	GLIS1	0.00102103
1	59702797	rs6700125	D	A	G	0.4184	0.3886	0.3889		0.000492673
1	59703738	rs6703534	D	A	G	0.3316	0.2911	0.2778		0.000221283
1	59734367	exm2252401	D	G	A	0.4171	0.39	0.3889		0.00043303
1	68055347	rs11585171	D	A	G	0.3163	0.2939	0.2598		3.02711e-05
1	85785751	rs233112	D	G	A	0.3839	0.3106	0.3138	DDAH1	0.000493085
1	97316690	rs11584143	D	A	G	0.1224	0.07242	0.08709		9.09825e-06
1	109605378	rs10466	D	A	G	0.1964	0.1616	0.1757	TAF13	3.5894e-05
1	113143420	exm84500	D	G	A	0.03197	0.02786	0.03153	ST7L	0.000286169
1	160786670	rs560681	D	G	A	0.3099	0.2953	0.2973	LY9	0.000217872
1	171179670	kgp7005320	D	G	C	0.1518	0.149	0.1351	FMO2	0.000143025
1	177905469	exm126209	D	A	C	0.2857	0.2214	0.2177	SEC16B	0.000161125
1	181525755	rs2332429	D	G	A	0.1594	0.149	0.1456	CACNA1E	0.000166421
1	203035551	rs6670637	D	A	G	0.4541	0.4164	0.4039	PPFIA4	8.59296e-05
1	205045087	rs1572993	D	A	G	0.4616	0.4011	0.3919	CNTN2	5.18444e-05
1	212344323	rs11119865	D	A	G	0.31	0.2877	0.2813		0.000420465
1	212357017	rs11119874	D	A	C	0.1594	0.1212	0.1156		0.000209261
1	212683565	rs878947	D	G	A	0.2035	0.1908	0.195		7.15817e-05
1	216194948	rs2317936	D	A	C	0.3724	0.3607	0.3679	USH2A	0.000162132
1	216205110	rs12121718	D	A	G	0.2334	0.2201	0.2177	USH2A	0.000510215
1	233134086	exm159581	D	A	G	0.2793	0.2479	0.2598	PCNXL2	0.000800286
1	238631540	rs10925657	D	A	G	0.4694	0.4457	0.4324		7.47469e-06
2	8700207	rs7609270	D	G	A	0.02551	0.009777	0.007508	AC011747.4	4.37526e-05
2	28892116	rs10192375	D	G	A	0.4987	0.4638	0.4655		0.000468619
2	28902004	rs4666115	D	A	G	0.4158	0.3774	0.3874		0.000817565
2	31342300	rs12621279	D	A	G	0.4061	0.3396	0.3313	GALNT14	7.12858e-06
2	41540966	rs7602964	D	C	A	0.3839	0.3705	0.3333		3.57358e-06
2	41556080	rs1508110	D	C	A	0.4031	0.383	0.3664		2.72207e-05
2	41630684	rs1508118	D	A	G	0.4094	0.3914	0.3664		2.28744e-05
2	41633989	rs6746520	D	G	A	0.4092	0.3914	0.3664		2.28744e-05
2	41644827	rs10210181	D	G	A	0.4273	0.4039	0.3754		1.69029e-05
2	41655276	rs2174883	D	A	G	0.426	0.405	0.3769		1.90211e-05
2	41721609	rs12474614	D	A	G	0.4235	0.3942	0.3799		5.16285e-06
2	41755591	rs4245775	D	G	A	0.4235	0.4011	0.3979		4.43832e-05
2	41784905	rs10208424	D	G	A	0.4273	0.4008	0.3934		2.47675e-05
2	64029271	rs6710230	D	A	G	0.2455	0.234	0.2342		1.25132e-05
2	64190732	rs12466966	D	A	G	0.1849	0.1643	0.1772	VPS54	8.28092e-06
2	64342469	rs7349403	D	A	G	0.1849	0.1755	0.1862	PELI1	0.000139155
2	65174408	rs7590631	D	C	A	0.1569	0.124	0.1261		4.86436e-05
2	69045158	rs10197806	D	A	C	0.3776	0.3426	0.3694	ARHGAP25	0.000344618
2	69049941	exm198914	D	G	A	0.3788	0.3426	0.3679	ARHGAP25	0.000307352
2	69049941	rs10177248	D	G	A	0.3788	0.3426	0.3679	ARHGAP25	0.000307352
2	74129895	rs1721244	D	G	A	0.4872	0.4429	0.4279	ACTG2	8.17053e-05
2	80272344	rs10865448	D	G	A	0.213	0.1838	0.1937	CTNNA2	0.000229163
2	88492058	rs1914733	D	G	A	0.2704	0.2563	0.2177		1.47308e-05
2	105593028	rs7608291	D	G	A	0.3367	0.3162	0.2973	AC010884.1	1.99697e-05
2	106063280	rs10496393	D	A	G	0.04209	0.02925	0.02553		2.36258e-05
2	106465351	rs13396833	D	G	A	0.3138	0.2827	0.2613	NCK2	0.000688268
2	135493304	rs10469555	D	A	G	0.03699	0.01532	0.01802		0.000196677
2	167649537	rs12993796	D	G	A	0.1756	0.1536	0.1366		0.00037695
2	225135115	rs10933051	D	G	A	0.2219	0.195	0.1802		0.000371831
2	225140153	rs1035316	D	G	A	0.2449	0.2089	0.1997		3.16241e-05
2	226023294	rs7582304	D	C	A	0.4439	0.4067	0.3844		0.000320252
2	226025235	rs1037246	D	G	A	0.426	0.3969	0.3724		0.000364992
2	235504056	rs4663447	D	G	A	0.2564	0.2563	0.2357		7.11463e-05
3	9979660	exm2265560	D	G	A	0.2564	0.2298	0.2252	CRELD1	0.000133057
3	9985656	rs3774207	D	A	G	0.25	0.2228	0.2192	CRELD1	5.10735e-05
3	9990800	exm289222	D	G	C	0.2538	0.227	0.2207	PRRT3	6.9944e-05
3	9991101	exm289238	D	C	G	0.2532	0.227	0.2222	PRRT3	8.25824e-05
3	9991163	exm289240	D	G	A	0.2526	0.227	0.2222	PRRT3	8.25824e-05
3	9996426	rs3846167	D	G	A	0.2519	0.227	0.2207	PRRT3_AS1	6.9944e-05
3	10009919	rs13063098	D	A	G	0.1718	0.1573	0.1465	EMC3	7.12714e-05
3	10013273	rs3732968	D	G	A	0.1709	0.156	0.1456	EMC3	8.76608e-05
3	10029289	rs3755783	D	G	A	0.1747	0.1546	0.1456	EMC3	1.57655e-05
3	10045703	rs6786636	D	G	A	0.2545	0.2235	0.2222	EMC3_AS1	7.18156e-05
3	10124120	rs6789156	D	A	G	0.1645	0.1365	0.1261	FANCD2	3.55266e-05
3	30540436	rs4331703	D	A	G	0.3852	0.3426	0.3228		0.000409111
3	39539526	rs614359	D	A	G	0.2564	0.2493	0.2417	MOBP	0.000641954
3	39555497	rs816491	D	C	A	0.2513	0.2382	0.2387	MOBP	0.000166422
3	39555580	rs864643	D	G	A	0.2513	0.2382	0.2387	MOBP	0.00102103
3	39573800	rs1615046	D	G	A	0.2494	0.236	0.2387		0.0001213
3	53630679	rs6445588	D	A	G	0.1327	0.1114	0.1036	CACNA1D	0.000108274
3	60388743	rs2734361	D	G	A	0.3061	0.2772	0.2688	FHIT	0.000205655
3	62941248	rs9311853	D	A	G	0.4273	0.4192	0.3994		4.16639e-06
3	69607472	rs7653574	D	A	G	0.3776	0.3106	0.3333		2.4456e-05
3	69637329	rs7630350	D	A	G	0.2934	0.2535	0.2613		1.17154e-05
3	86286959	rs4263293	D	A	G	0.4298	0.3955	0.4144		0.000358746
3	86381883	rs1170214	D	A	G	0.4273	0.3705	0.4129		8.52977e-05
3	139009532	rs2046965	D	A	G	0.4503	0.4262	0.4174		9.38067e-05
3	174895840	rs2035101	D	A	G	0.4298	0.3635	0.3739	NAALADL2	0.000147942
3	195652973	rs13061255	D	A	G	0.1964	0.1643	0.1697		0.000335215
4	282499	rs11723261	D	G	A	0.1594	0.1309	0.1441	ZNF732	0.00051008
4	6697766	rs3822262	D	C	A	0.2908	0.234	0.2162	S100P	0.000126654
4	7215322	rs4689642	D	G	A	0.3138	0.2409	0.2387	SORCS2	3.42779e-06
4	7220548	rs16839840	D	A	G	0.1995	0.156	0.1577	SORCS2	4.98622e-05
4	7221071	rs12646898	D	G	A	0.2647	0.1992	0.2012	SORCS2	2.00512e-05
4	7226751	rs4689090	D	A	C	0.2487	0.2047	0.2027	SORCS2	1.14659e-05
4	7239621	rs4689093	D	G	A	0.2921	0.2354	0.2402	SORCS2	0.000116377
4	15688604	exm390732	D	G	C	0.09821	0.07521	0.07808	FAM200B	0.000366767
4	54460824	rs1464028	D	A	C	0.3278	0.2723	0.2583	LNX1_AS2	3.86606e-05
4	59548868	rs10033443	D	A	G	0.4845	0.4761	0.4758		0.000753204
4	72743549	rs10022720	D	G	A	0.4552	0.4095	0.3844		0.000538198
4	73518909	rs12644269	D	A	G	0.3622	0.3593	0.3559		2.81043e-06
4	73543031	rs2086471	D	G	A	0.4783	0.4596	0.4595		4.14963e-06
4	77503120	rs12503111	D	A	C	0.4605	0.4064	0.4084	SHROOM3	3.98904e-06
4	77560811	rs17322529	D	A	G	0.4796	0.4358	0.4339	SHROOM3	0.000300915
4	94239926	rs1433676	D	G	A	0.3584	0.3036	0.3063	GRID2	3.47583e-06
4	106156187	exm416928	D	A	G	0.0676	0.04596	0.04955	TET2	0.000314834
4	129737089	rs10017436	D	A	G	0.4745	0.4109	0.4084	JADE1	0.000192734
4	130030944	rs337276	D	C	A	0.4643	0.415	0.4414	C4orf33	0.000167494
4	130130625	rs512552	D	C	A	0.1964	0.1797	0.1532		2.54453e-05
4	137727533	rs2169147	D	G	A	0.3673	0.3106	0.3333		0.000425632
4	148987972	rs7660368	D	A	G	0.4987	0.4513	0.4535	ARHGAP10	0.000194934
4	156692818	rs1563806	D	C	A	0.4286	0.39	0.3837	GUCY1B3	0.00079164
4	165793001	rs4459954	D	A	G	0.2245	0.1811	0.1712		0.00089061
5	10308240	rs10072686	D	G	A	0.3457	0.2911	0.3168	CMBL	0.000164325
5	11365166	rs2074260	D	A	G	0.4808	0.4485	0.4489	CTNND2	9.63459e-05
5	29735598	rs3114523	D	C	A	0.1097	0.09471	0.1081		0.000275025
5	45467538	rs10473387	D	A	G	0.2143	0.1922	0.1802	HCN1	0.000229628
5	45478008	kgp10762402	D	C	A	0.2143	0.1922	0.1802	HCN1	0.000229628
5	45561801	rs10473389	D	A	G	0.2372	0.2117	0.2087	HCN1	0.000262156
5	45671667	rs10074312	D	C	A	0.2474	0.2145	0.2207	HCN1	4.77828e-05
5	45906895	kgp9722106	D	A	C	0.2462	0.2159	0.2177		0.000123248
5	45996902	rs10041094	D	A	G	0.2468	0.2191	0.2162		6.56286e-05
5	74371635	rs7720035	D	G	A	0.04082	0.03064	0.01952	ANKRD31	0.000253237
5	74488590	exm461442	D	A	G	0.04082	0.03064	0.01952	ANKRD31	0.000253237
5	81053445	rs1550802	D	C	A	0.1582	0.1184	0.1381		0.000320789
5	86282429	rs10514289	D	G	A	0.263	0.2139	0.2287		0.000230218
5	169805956	exm503022	D	G	C	0.1582	0.1198	0.1096	KCNIP1	1.48369e-06
6	2012739	rs6596867	D	C	A	0.4605	0.4248	0.4279	GMDS	0.000162393
6	2048584	rs4959630	D	A	G	0.4439	0.4123	0.4054	GMDS	0.000249482
6	10926942	rs12213249	D	A	G	0.3036	0.2298	0.2432	SYCP2L	0.000513301
6	29698821	rs1611350	D	G	A	0.273	0.2423	0.2252	HLA_F_AS1	0.00102103
6	38850809	rs862432	D	A	C	0.01531	0.004178	0.004505	DNAH8	0.000559882
6	42260911	rs9394894	D	A	G	0.3393	0.3134	0.2988	TRERF1	0.000764392
6	96159101	rs4382270	D	A	G	0.3125	0.2953	0.2778		0.000287291
6	96164110	rs9482958	D	A	G	0.3112	0.2955	0.2778		0.000282646
6	96218908	rs9493940	D	A	G	0.2923	0.2654	0.2659		0.000640275
6	105643136	exm2266331	D	G	A	0.1982	0.1546	0.1562		0.00032312
6	120088951	rs10456925	D	G	A	0.2908	0.2423	0.2613		9.79724e-05
6	120284480	rs726178	D	A	G	0.2462	0.2031	0.2117		0.000378582
6	124876943	rs971927	D	G	A	0.4668	0.4624	0.473	NKAIN2	0.000253123
6	124911565	rs641498	D	A	G	0.4898	0.4443	0.4715	NKAIN2	3.47185e-05
6	138391562	rs9321647	D	A	G	0.4898	0.4763	0.4835		0.000351571
6	143890039	rs10979	D	G	A	0.352	0.2883	0.3033	RP11_436I24.1	0.000417602
6	168774529	rs1886399	D	A	G	0.3393	0.2939	0.3003		0.000329883
6	168805887	rs9364253	D	C	A	0.426	0.3705	0.3709		1.66365e-06
7	7167627	rs1529647	D	G	A	0.1512	0.138	0.1212		0.000616061
7	12870484	rs10236747	D	A	G	0.1633	0.1476	0.1336		0.000181248
7	16875057	rs7809532	D	A	G	0.3814	0.3565	0.3408		0.000483031
7	21742974	rs368331	D	G	A	0.0727	0.04457	0.04505	DNAH11	0.00102103
7	36838434	rs6950956	D	G	A	0.3087	0.2799	0.2658		3.60345e-05
7	36970474	rs4720230	D	A	G	0.2742	0.2437	0.2297	ELMO1	4.7794e-05
7	48312084	exm620530	D	G	C	0.07526	0.06267	0.05856	ABCA13	0.000204505
7	48349647	exm620784	D	A	G	0.1594	0.1184	0.1231	ABCA13	0.000653991
7	52218507	rs7790298	D	A	G	0.1429	0.1198	0.1096		2.9613e-06
7	53420481	rs10252217	D	A	G	0.08036	0.05432	0.05856		0.000136829
7	54018828	rs1526768	D	A	G	0.4974	0.4499	0.464		0.000130213
7	86238294	rs12704279	D	A	C	0.2054	0.1574	0.1637		0.000127023
7	106433166	rs6974881	D	G	A	0.4375	0.376	0.3859		7.25378e-05
7	155276541	rs12538214	D	A	G	0.1977	0.1421	0.1667		1.81641e-05
8	3045187	rs2125952	D	G	A	0.4222	0.3788	0.3949	CSMD1	0.000533734
8	3900812	rs7003625	D	G	A	0.3227	0.2632	0.2688	CSMD1	1.53778e-05
8	16173694	rs12545451	D	G	A	0.07928	0.05587	0.05422		3.79407e-05
8	18674816	rs2632838	D	G	A	0.3824	0.3482	0.3468	PSD3	3.03135e-05
8	18695831	rs6586773	D	A	C	0.3839	0.3398	0.3453	PSD3	8.11479e-06
8	18699659	rs11204002	D	A	G	0.4783	0.4109	0.4354	PSD3	4.6671e-05
8	56318630	rs2939691	D	G	A	0.05357	0.02646	0.02853	XKR4	0.000654355
8	81426196	exm707347	D	A	C	0.03954	0.02786	0.02402	ZBTB10	0.000793761
8	103058601	rs6991144	D	A	G	0.1008	0.0961	0.1036	NCALD	0.000618608
8	104151423	rs6999622	D	A	G	0.1798	0.1407	0.1426	BAALC	0.000110407
8	112888825	rs10087987	D	A	G	0.2309	0.1922	0.1817		4.44077e-05
8	113004964	kgp1125931	D	A	G	0.1492	0.124	0.1171		1.27837e-05
8	117952142	rs16889293	D	A	G	0.3559	0.2883	0.3168	AARD	1.26752e-05
9	4545998	rs10815016	D	G	A	0.1148	0.09192	0.08859	SLC1A1	0.000487636
9	8179325	rs4130580	D	A	G	0.1722	0.1309	0.1486		1.87142e-05
9	8221247	rs4742469	D	A	G	0.2194	0.1838	0.1922		0.000353835
9	13980085	rs7048074	D	A	G	0.3673	0.3301	0.3438		0.000210203
9	15188106	exm740234	D	A	G	0.4962	0.4499	0.452	TTC39B	0.000728269
9	32784838	exm2259320	D	G	A	0.3338	0.2883	0.3018	TMEM215	0.000326447
9	38720627	rs12682690	D	A	G	0.2526	0.2354	0.2132		0.000146878
9	82971893	rs1333940	D	G	A	0.4783	0.4499	0.4565		7.19599e-05
9	83070204	rs11138672	D	G	A	0.1888	0.1699	0.1697		0.000104033
9	84344542	rs3860897	D	C	A	0.3763	0.3552	0.3348	RP11_154D17.1	0.000128166
9	89858267	rs10122994	D	A	G	0.4809	0.4567	0.467		0.000278077
9	94454217	rs1201041	D	G	A	0.298	0.2451	0.2568		6.82591e-05
9	94483198	rs7466603	D	A	G	0.3699	0.305	0.3318	ROR2	3.2474e-06
9	101361584	rs10819072	D	C	A	0.3648	0.3412	0.3048	GABBR2	8.84375e-05
9	102179061	rs10760682	D	G	A	0.3508	0.3092	0.3288		0.000652634
9	114846751	rs10981252	D	G	A	0.2041	0.1992	0.1862	SUSD1	0.000625981
9	133967510	rs818055	D	A	C	0.1952	0.1727	0.1727	LAMC3	0.000843337
10	10607497	rs7096494	D	A	G	0.4082	0.4053	0.4174		0.000352681
10	10628935	rs11256691	D	G	A	0.4605	0.4526	0.4489		0.000198701
10	17400951	rs932877	D	G	A	0.3546	0.3175	0.3163	ST8SIA6	0.000372926
10	27477821	rs882475	D	A	C	0.3202	0.3106	0.3183	MASTL	1.24854e-05
10	34629851	rs2384210	D	G	A	0.4107	0.3663	0.3544	PARD3	1.07557e-06
10	34694931	rs3905150	D	A	G	0.4745	0.4666	0.4505	PARD3	0.000169649
10	44160627	rs3123665	D	A	G	0.2806	0.234	0.2312	ZNF32_AS3	0.000372759
10	45559980	rs7077032	D	G	A	0.3431	0.3064	0.3003		6.88567e-05
10	45565290	rs7913550	D	A	G	0.3916	0.3663	0.3453		0.00024862
10	67522622	rs10822628	D	A	C	0.148	0.1226	0.1261		0.000329192
10	84136681	rs7078253	D	C	A	0.08612	0.05587	0.05675	NRG3	1.63776e-05
10	84179887	rs7069578	D	A	G	0.1033	0.07103	0.07958	NRG3	0.000208196
10	93220104	rs11186575	D	A	G	0.03205	0.01676	0.01506	HECTD2	0.000197582
10	106650949	rs7073438	D	A	G	0.3316	0.312	0.2928	SORCS3	0.000186063
10	106675585	rs6584635	D	A	G	0.3253	0.3036	0.2778	SORCS3	1.60615e-05
10	106689135	rs7080542	D	G	A	0.25	0.2312	0.1982	SORCS3	1.72559e-05
10	106731970	exm2259516	D	A	G	0.3074	0.273	0.2613	SORCS3	2.07159e-05
10	106763400	rs17118067	D	A	C	0.2084	0.1788	0.1577	SORCS3	9.88399e-06
10	106792734	rs1881224	D	G	A	0.3291	0.3175	0.2883	SORCS3	0.000250105
10	118129299	rs12244656	D	G	A	0.07417	0.05042	0.04354	CCDC172	0.000259856
10	120031952	rs11198344	D	G	A	0.4796	0.4345	0.4414		0.000181403
10	120585915	rs4752208	D	A	G	0.3393	0.2855	0.3228		2.20539e-05
10	121408071	rs196290	D	G	A	0.5	0.4903	0.4895		0.000215139
11	316299	rs7947900	D	A	C	0.4015	0.338	0.3423	IFITM1	2.2621e-05
11	3792657	rs7931756	D	A	C	0.0617	0.04902	0.04354	NUP98	0.000792477
11	11269086	rs4441010	D	C	A	0.2806	0.2242	0.2297		0.000158715
11	11270851	rs10831556	D	A	C	0.3227	0.2549	0.2613		9.20343e-06
11	37141853	rs11033958	D	A	C	0.1531	0.1267	0.1381		2.01186e-05
11	39749305	rs769866	D	G	A	0.2755	0.2242	0.2282		0.000486693
11	41140807	rs11036246	D	G	A	0.2321	0.1811	0.1562	LRRC4C	2.07491e-05
11	41148433	rs11036247	D	G	A	0.2385	0.1964	0.1667	LRRC4C	5.81466e-05
11	66359489	exm931019	D	A	G	0.02564	0.009777	0.01057	CCS	0.000349682
11	81051151	rs1458105	D	A	G	0.227	0.156	0.1637		6.1743e-06
11	81132183	rs11232664	D	G	A	0.2321	0.1741	0.1847		6.34374e-05
11	98445605	rs4567424	D	A	G	0.1969	0.1522	0.1471		0.000163327
11	103991641	rs11226185	D	G	A	0.1224	0.1031	0.09309	PDGFD	0.000109816
11	123158221	rs10892999	D	A	C	0.4974	0.4526	0.455		0.000798372
11	133154441	rs1941220	D	A	G	0.4847	0.4109	0.4219	OPCML	3.66689e-06
12	221203	rs7135126	D	A	G	0.3202	0.2772	0.2703	IQSEC3	0.000325672
12	232123	rs1532609	D	A	G	0.3597	0.3036	0.3063	IQSEC3	0.000175237
12	11648418	rs2908835	D	A	G	0.2583	0.2312	0.2177		0.000399481
12	74339372	rs7311068	D	A	G	0.4222	0.3844	0.3949		5.1452e-05
12	118146321	rs1566889	D	G	A	0.449	0.4248	0.4129	KSR2	0.000129173
12	130591803	rs11060702	D	A	G	0.4898	0.4401	0.4249		5.54151e-06
12	130593061	rs12317910	D	G	A	0.4452	0.3802	0.3709		1.05604e-07
13	31412128	rs7328020	D	A	C	0.2564	0.2521	0.2372		0.000135852
13	61705568	rs11841677	D	C	A	0.3622	0.337	0.3198		0.000591758
13	61787045	rs3102191	D	A	C	0.3342	0.2994	0.2823		2.49221e-05
13	74599209	rs4885145	D	G	A	0.176	0.1448	0.1532	KLF12	9.71058e-05
13	86229641	exm2271969	D	A	G	0.3329	0.2598	0.2477		5.15505e-06
13	86237717	rs1753768	D	A	C	0.2538	0.1825	0.1892		2.04917e-05
13	86255424	rs1753789	D	A	G	0.2564	0.188	0.1937		5.44848e-05
13	86276094	rs1538050	D	A	G	0.2602	0.1922	0.1892		5.44848e-05
13	86289458	rs9547337	D	G	A	0.2028	0.1369	0.1517		1.9774e-05
13	105180723	rs7999784	D	A	C	0.2602	0.2298	0.2312		0.000518529
13	105496802	rs9519494	D	A	G	0.2647	0.2173	0.2342		7.491e-06
13	105782961	exm2267572	D	G	A	0.4974	0.4471	0.467		0.000222236
13	108329313	rs4772906	D	A	G	0.445	0.4443	0.4414	FAM155A	0.000685192
13	108416500	rs1547801	D	G	A	0.3839	0.3677	0.3438	FAM155A	1.80409e-06
14	20562080	rs969774	D	A	G	0.2258	0.2047	0.1847		0.000105965
14	20677814	rs8012050	D	A	G	0.1199	0.08496	0.0976		0.000216522
14	21105249	rs12432620	D	G	A	0.4987	0.4638	0.4655		0.000111029
14	23632506	rs910795	D	G	A	0.1441	0.1281	0.1246	SLC7A8	7.55729e-05
14	27857578	rs1955205	D	A	C	0.09103	0.07003	0.06344		0.000175658
14	27860074	rs12887478	D	C	A	0.2653	0.227	0.2012		7.21893e-05
14	27863056	rs1379141	D	A	G	0.09056	0.06964	0.06757		0.000131083
14	27905391	rs8018807	D	G	A	0.3788	0.3691	0.3589		0.000110044
14	27955256	rs1954664	D	C	A	0.3316	0.3148	0.3138		0.000333653
14	27955485	rs8013302	D	G	A	0.3367	0.3189	0.3138		0.000434671
14	27985160	rs1954684	D	A	G	0.3265	0.312	0.3033		0.000293948
14	28036204	rs1954677	D	A	G	0.2806	0.2674	0.2568		0.000171014
14	40855032	rs1952933	D	G	A	0.1824	0.149	0.1321		0.000156917
14	42925739	rs10140338	D	G	A	0.3737	0.351	0.3348		0.000320346
14	49724328	rs7140895	D	G	A	0.2532	0.2201	0.2342		6.71492e-05
14	49796213	rs8012175	D	A	G	0.2462	0.2298	0.2372		0.000738092
14	54659207	rs8008441	D	G	A	0.2054	0.1671	0.1637		0.000392239
14	76571855	rs11159175	D	A	G	0.3508	0.3217	0.3078		1.67644e-05
14	77120744	rs11159221	D	G	A	0.1897	0.1657	0.1922		0.000338807
14	98682107	rs4905653	D	A	G	0.3125	0.2591	0.2417		0.000849819
14	99434288	rs2094718	D	C	A	0.3367	0.2723	0.2718		1.34515e-05
14	99438247	rs957421	D	G	A	0.4362	0.3621	0.3709		1.74336e-05
15	26627762	rs11632951	D	G	A	0.2449	0.2033	0.2192		0.00056094
15	27916934	rs3098583	D	A	G	0.3712	0.3468	0.3529		0.000447492
15	42981806	exm1154518	D	A	G	0.2245	0.1908	0.2072	STARD9	0.000470948
15	43012195	rs3199486	D	G	A	0.2551	0.2159	0.2282	STARD9	0.000787068
15	50224311	rs12148767	D	C	A	0.3316	0.3022	0.3123	ATP8B4	0.000527083
15	50233606	rs12916154	D	G	A	0.4158	0.3858	0.3874	ATP8B4	0.000150337
15	50376587	rs8040030	D	A	G	0.4872	0.4234	0.4129	ATP8B4	3.46055e-07
15	50397504	rs6493402	D	G	A	0.3811	0.317	0.3213	ATP8B4	4.27181e-05
15	62114865	rs8034714	D	A	C	0.2883	0.1978	0.2327		1.10245e-05
15	72070005	rs3825804	D	A	G	0.06888	0.04318	0.04505	THSD4	0.000811955
15	78601654	rs7183765	D	A	G	0.2526	0.2298	0.2237		0.000119356
15	102008648	rs6598481	D	A	G	0.1811	0.1476	0.1607	PCSK6	0.000128721
16	6131347	rs929889	D	A	G	0.3163	0.2716	0.2838	RBFOX1	0.000183412
16	54745610	rs1420553	D	A	G	0.3597	0.3315	0.3303		2.44495e-05
16	60288434	rs7204862	D	A	G	0.4043	0.3217	0.3453		0.00029337
16	83999548	exm1263180	D	G	A	0.03699	0.01671	0.01652	OSGIN1	0.000211585
17	578180	rs838369	D	A	G	0.4834	0.4693	0.491	VPS53	0.000173215
17	7761512	exm1289873	D	A	C	0.1176	0.08357	0.09309		0.000322998
17	8742830	rs9910718	D	A	G	0.3418	0.3148	0.3048	PIK3R6	7.1871e-05
17	77163564	rs9894427	D	A	G	0.0718	0.04958	0.05758	RBFOX3	7.01204e-05
18	6549667	rs1941495	D	C	A	0.2487	0.2033	0.2237	C18orf64	5.16793e-05
18	22085864	rs553019	D	G	A	0.4936	0.4777	0.491		0.00042426
18	28255053	rs9952812	D	A	G	0.3214	0.2897	0.3078		0.000238702
18	28281252	rs1943560	D	A	G	0.2628	0.2507	0.2417		0.00026003
18	29745782	rs8092245	D	A	C	0.1926	0.1769	0.1772		0.000578127
18	29795101	exm1381707	D	A	G	0.3112	0.2841	0.2763	MEP1B	7.62255e-05
18	29806558	rs600452	D	A	C	0.3163	0.2758	0.2748		4.27719e-05
18	36997886	rs4627440	D	G	A	0.3648	0.3454	0.3649	LINC00669	5.91892e-05
19	7068207	rs2914572	D	G	A	0.4273	0.337	0.3483	ZNF557	0.000198053
19	8921486	rs1582532	D	G	A	0.3329	0.3148	0.2853	ZNF558	9.58948e-05
19	31229053	rs17615623	D	C	A	0.1735	0.1351	0.1441		6.30686e-05
19	49189026	rs10414887	D	A	G	0.1518	0.1142	0.113		3.46093e-05
19	49438363	exm1488870	D	A	G	0.2296	0.2006	0.2192	DHDH	0.00016023
19	49438363	rs2270941	D	A	G	0.2296	0.2006	0.2192	DHDH	0.00016023
20	368905	exm1517960	D	G	A	0.1429	0.1295	0.1216	TRIB3	1.30295e-05
20	10619014	rs7828	D	C	A	0.3903	0.3394	0.3529	JAG1	6.18067e-05
20	17882452	rs2618647	D	A	G	0.4655	0.4053	0.3709		2.76366e-05
20	29942695	rs6057603	D	A	G	0.1926	0.1699	0.1712		0.000236563
20	43933021	exm1544384	D	A	C	0.3329	0.273	0.2973	MATN4	1.28437e-05
20	43933163	rs2233094	D	G	A	0.3329	0.273	0.2973	MATN4	1.28437e-05
20	45188433	rs4809591	D	A	C	0.08673	0.04178	0.05856	SLC13A3	6.38481e-05
20	46490407	rs6512486	D	C	A	0.2156	0.1866	0.1847		2.92089e-05
20	46494573	rs8121494	D	A	G	0.2207	0.188	0.1847		0.000654963
20	48600631	exm1549376	D	G	A	0.1645	0.1184	0.1265	SNAI1	0.00035914
20	59307221	rs1201999	D	G	A	0.3304	0.3273	0.3408		0.000424361
22	24715049	rs5751846	D	A	G	0.2494	0.2437	0.2357	SPECC1L	0.000112075
22	27508858	rs4822859	D	G	A	0.2105	0.2061	0.2132		0.000320733
22	29702654	rs1894414	D	C	A	0.2309	0.2006	0.1997	GAS2L1	5.15182e-06
22	49722925	rs848756	D	A	C	0.2972	0.2911	0.2523		4.06751e-05
23	5379481	rs5961715	D	A	G	0.4349	0.335	0.3909		2.47402e-06
23	5936928	rs6529912	D	A	G	0.03006	0.01967	0.01015	NLGN4X	0.000282117
23	9751474	rs5934683	D	A	G	0.4689	0.4	0.3905		1.87082e-05
23	31327827	rs2178537	D	A	G	0.2329	0.1754	0.1847	DMD	0.000313201
23	37464533	exm2273242	D	G	A	0.08216	0.04426	0.04399		0.000687203
23	37464533	rs17145785	D	G	A	0.08216	0.04426	0.04399	LANCL3	0.000687203
23	81422808	kgp22746301	D	A	G	0.4248	0.3393	0.3305		0.000430341
23	81512091	exm2273152	D	G	A	0.4248	0.3361	0.3271		0.000305114
23	103030520	rs471416	D	G	A	0.3795	0.3164	0.313	PLP1	0.000233461
23	144646542	rs6626371	D	G	A	0.491	0.4475	0.4525		0.000239589
23	144820847	rs714430	D	G	A	0.3948	0.3344	0.3475		9.33841e-05
25	181779	exm2273223	D	G	A	0.148	0.1086	0.09187		7.8798e-05

[truncated: 3 more sheets: Table 11S, Table 12S, Table 13S]
